# Supplementary material
Source: PubMed Central journal article supplement (PMC4794625)

Hewitson et al., Supplementary Figure 1

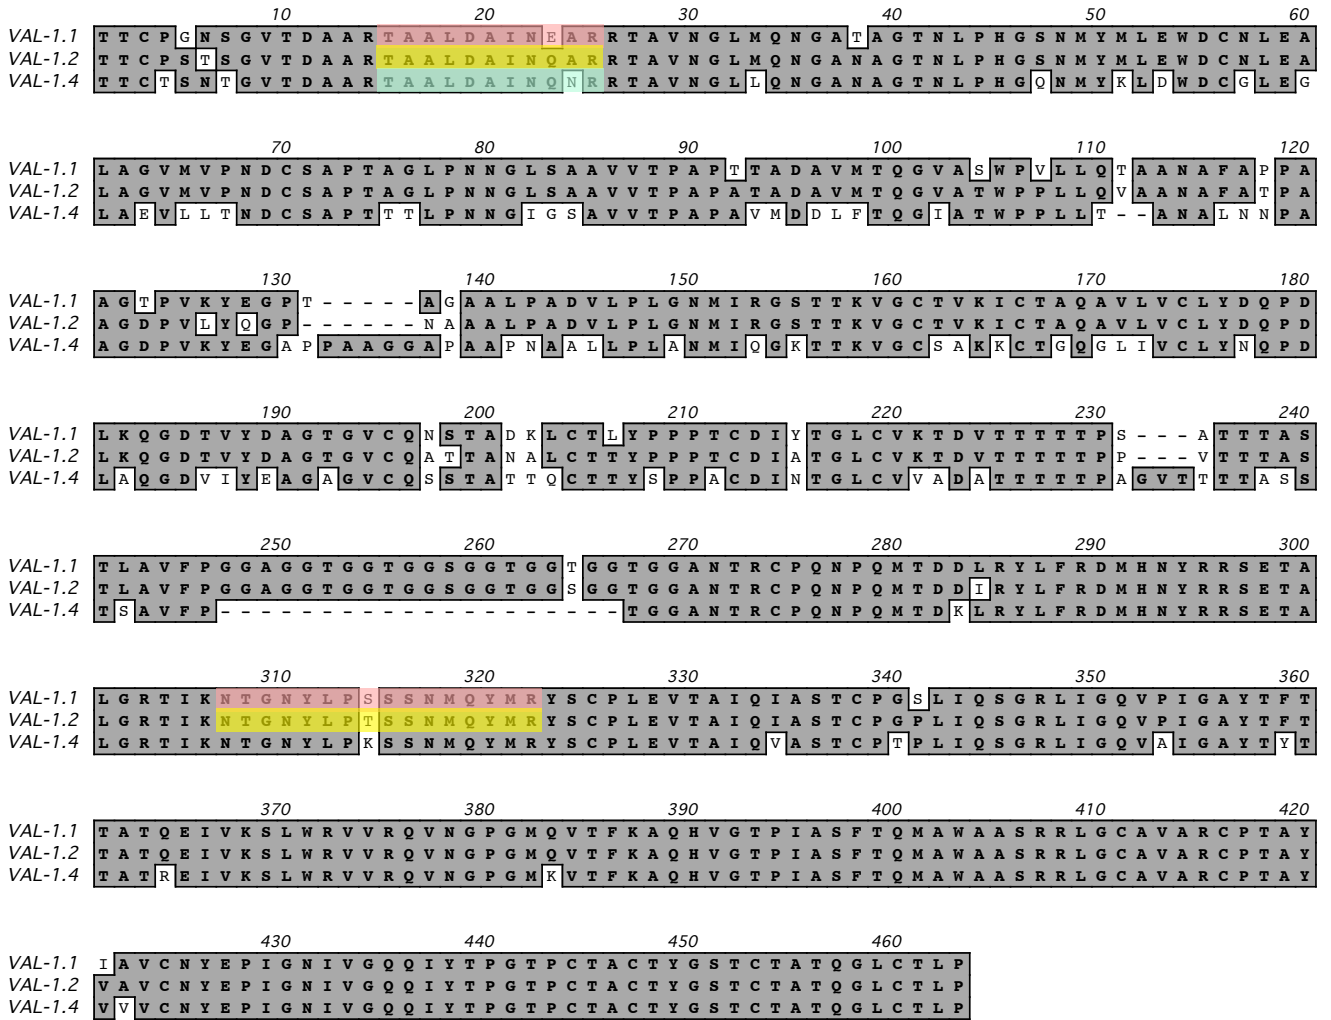

Hewitson et al., Supplementary Figure 2

Method: Neighbor Joining; Bootstrap (1000 reps); tie breaking = Systematic  
 Distance: Uncorrected ("p")  
 Gaps distributed proportionally

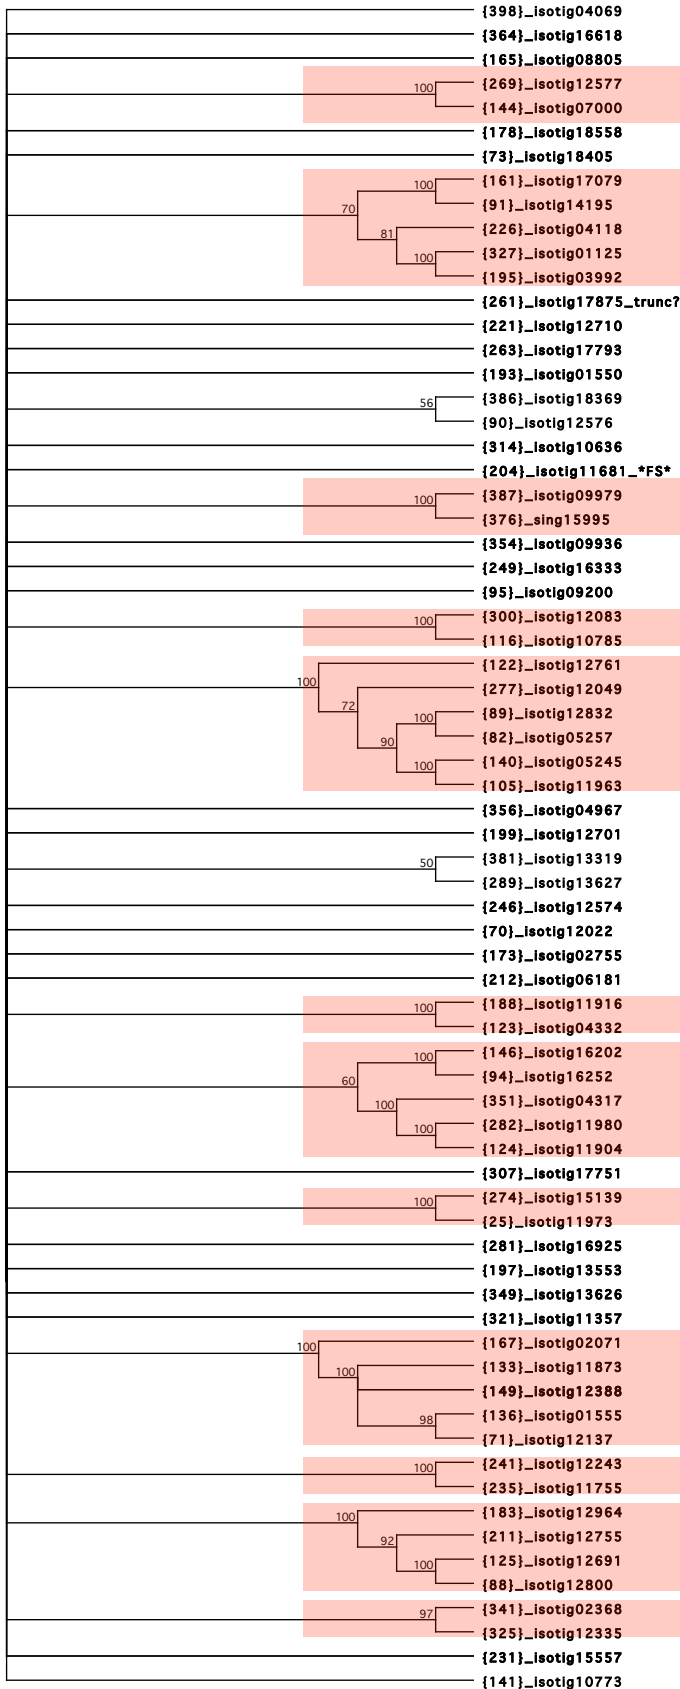

Replace tree with table detailing Mw / pI / related sequences in HES

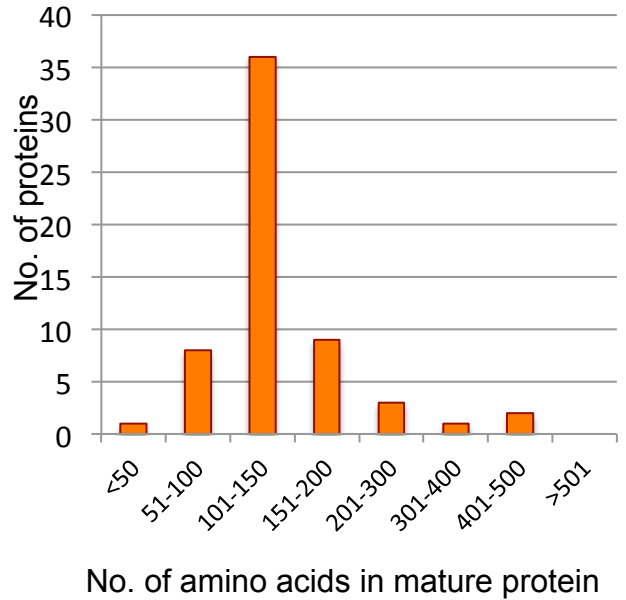

Hewitson et al.,  
Supplementary Figure 3

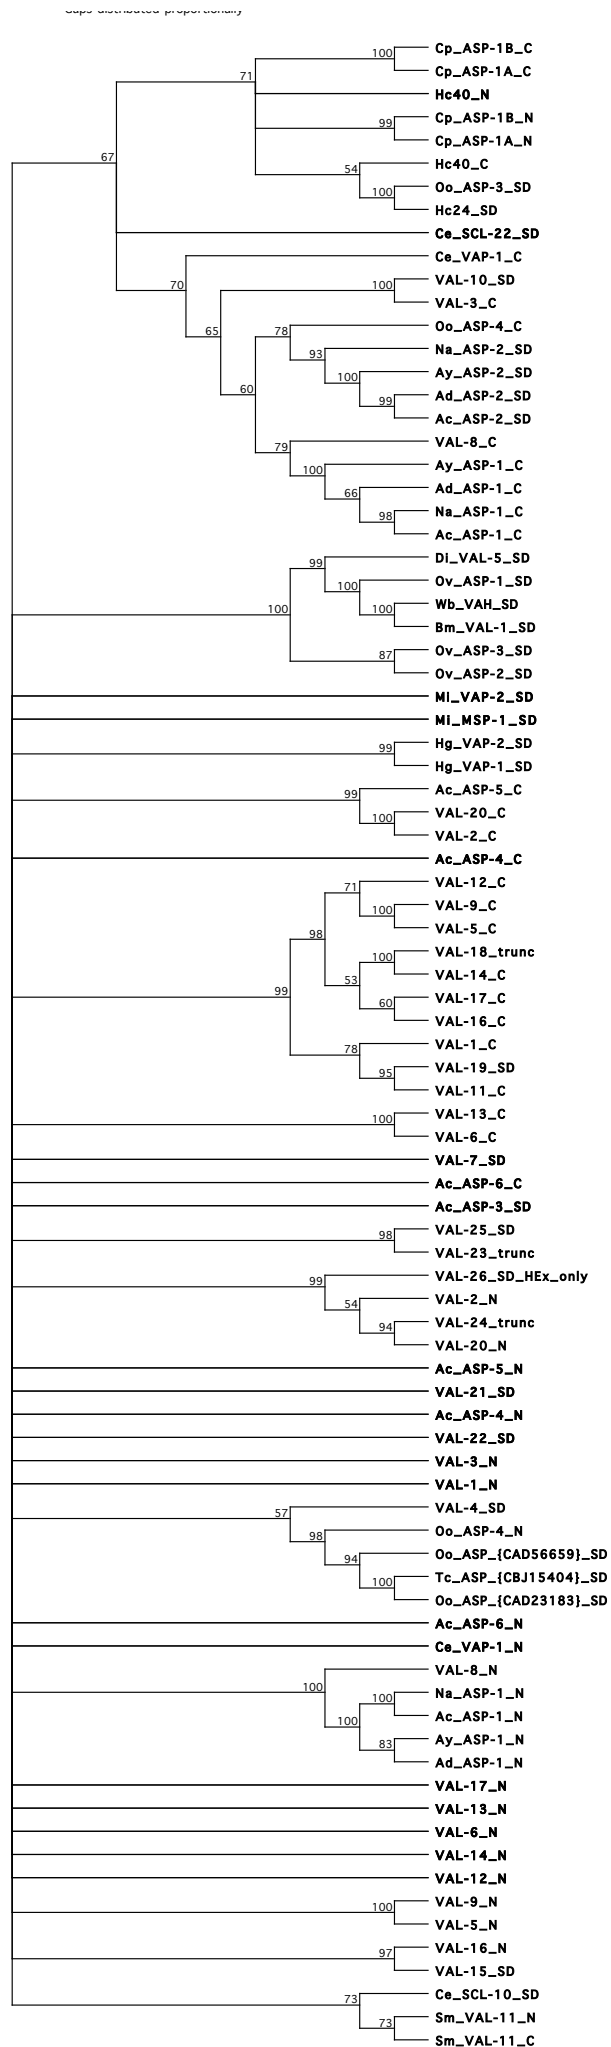

Supplement: NIHMS67505-supplement-Supplementary_figures.pdf [file NIHMS67505-supplement-Supplementary_figures.pdf]
