# Supplementary material
Source: PubMed Central journal article supplement (PMC4794625)
Supplement: NIHMS67505-supplement-Supplementary_Table_1.pdf [file NIHMS67505-supplement-Supplementary_Table_1.pdf]

## Supplementary Table 1

### Alphabetical listing of proteins identified in HES

| Rank | Identity                         | Conserved domains       | Code                 | Score | SS  |
|------|----------------------------------|-------------------------|----------------------|-------|-----|
| 138  | 14-3-3 family member             | 14-3-3                  | Hpb_Ad_1_isotig07975 | 324   | NO  |
| 213  | 15kDa ES antigen (Hc15)          | None                    | Hpb_Ad_1_isotig11615 | 150   | SS  |
| 371  | 15kDa ES antigen (Hc15)          | None                    | Hpb_Ad_1_isotig13084 | 33    | SS  |
| 29   | ACE-1 Acetylcholinesterase       | Esterase_lipase         | Hpb_Ad_1_isotig05694 | 1527  | SS  |
| 43   | ACE-2 Acetylcholinesterase       | Esterase_lipase         | Hpb_Ad_1_isotig00868 | 1122  | SS  |
| 49   | ACE-3 Acetylcholinesterase       | Esterase_lipase         | Hpb_Ad_1_isotig00869 | 1006  | SS  |
| 131  | Actin                            | Actin                   | Hpb_Ad_1_isotig01640 | 340   | NO  |
| 255  | Actin                            | Actin                   | Hpb_Ad_1_isotig08340 | 102   | NO  |
| 219  | Actin depolymerising factor      | ADF                     | Hpb_Ad_1_isotig07522 | 145   | NO  |
| 85   | Aldolase                         | FBP_aldolase_I_a        | Hpb_Ad_1_isotig04915 | 627   | NO  |
| 281  | Aldolase                         | FBP_aldolase_I_a        | Hpb_Ad_1_isotig07465 | 84    | NO  |
| 307  | Aldolase                         | FBP_aldolase_I_a        | Hpb_Ad_1_isotig04899 | 67    | NO  |
| 295  | Alpha amylase                    | Alpha-amylase_C         | Hpb_Ad_1_isotig06408 | 79    | NO  |
| 251  | Alpha-L-fucosidase family member | Alpha_L_fucos           | Hpb_Ad_1_isotig06108 | 105   | SS  |
| 328  | Alpha-mannosidase family member  | PLN02701 multidomain    | Hpb_Ad_1_isotig05364 | 53    | SS* |
| 268  | Aminopeptidase                   | None                    | Hpb_Ad_1_isotig00804 | 93    | SS* |
| 152  | Annexin                          | Annexin (Double)        | Hpb_Ad_1_isotig11499 | 281   | NO  |
| 18   | APY-1.1 Apyrase-1.1              | Apyrase                 | Hpb_Ad_1_isotig02250 | 1833  | SS  |
| 19   | APY-1.2 Apyrase-1.2              | Apyrase                 | Hpb_Ad_1_isotig07986 | 1818  | SS  |
| 25   | APY-1.3 Apyrase-1.3              | Apyrase                 | Hpb_Ad_1_isotig05261 | 1583  | SS  |
| 31   | APY-2 Apyrase-2                  | Apyrase                 | Hpb_Ad_1_isotig07051 | 1474  | SS  |
| 83   | APY-3 Apyrase-3                  | Apyrase                 | Hpb_Ad_1_isotig03589 | 644   | SS  |
| 120  | APY-4 Apyrase-4                  | Apyrase                 | Hpb_Ad_1_isotig08061 | 394   | SS  |
| 185  | Arginine kinase                  | Arginine_kinase_like    | Hpb_Ad_1_isotig05009 | 212   | NO  |
| 56   | Aspartyl protease (necepsin)     | pepsin_retropepsin_like | Hpb_Ad_1_isotig06497 | 884   | SS  |
| 109  | Aspartyl protease (necepsin)     | pepsin_retropepsin_like | Hpb_Ad_1_isotig03173 | 433   | SS  |
| 119  | Aspartyl protease (necepsin)     | pepsin_retropepsin_like | Hpb_Ad_1_isotig04987 | 395   | SS* |
| 146  | Aspartyl protease (necepsin)     | pepsin_retropepsin_like | Hpb_Ad_1_isotig01578 | 310   | SS  |
| 206  | Aspartyl protease (necepsin)     | pepsin_retropepsin_like | Hpb_Ad_1_isotig06987 | 173   | SS* |
| 42   | Astacin protease NAS-1.1         | ZnMc_astacin_like       | Hpb_Ad_1_isotig04178 | 1148  | SS* |
| 45   | Astacin protease NAS-1.2         | ZnMc_astacin_like       | Hpb_Ad_1_isotig04179 | 1095  | SS* |

|     |                                             |                              |                      |      |     |
|-----|---------------------------------------------|------------------------------|----------------------|------|-----|
| 59  | Astacin protease NAS-2.1                    | ZnMc_astacin_like            | Hpb_Ad_1_isotig01336 | 858  | SS* |
| 61  | Astacin protease NAS-2.2                    | ZnMc_astacin_like            | Hpb_Ad_1_isotig01334 | 836  | SS* |
| 62  | Astacin protease NAS-3.1                    | ZnMc_astacin_like            | Hpb_Ad_1_isotig01799 | 832  | SS* |
| 63  | Astacin protease NAS-4                      | ZnMc_astacin_like            | Hpb_Ad_1_isotig00214 | 830  | SS* |
| 71  | Astacin protease NAS-5.1                    | ZnMc_astacin_like; CUB       | Hpb_Ad_1_isotig01596 | 779  | SS* |
| 76  | Astacin protease NAS-5.2                    | ZnMc_astacin_like; CUB       | Hpb_Ad_1_isotig01598 | 691  | SS* |
| 80  | Astacin protease NAS-6                      | ZnMc_astacin_like; CUB       | Hpb_Ad_1_isotig07866 | 681  | SS* |
| 98  | Astacin protease NAS-3.2                    | ZnMc_astacin_like            | Hpb_Ad_1_isotig01792 | 509  | SS* |
| 100 | Astacin protease NAS-3.3                    | ZnMc_astacin_like            | Hpb_Ad_1_isotig01791 | 498  | SS* |
| 116 | Astacin protease NAS-7                      | ZnMc_astacin_like            | Hpb_Ad_1_isotig06217 | 399  | SS  |
| 149 | Astacin protease NAS-8                      | ZnMc_astacin_like            | Hpb_Ad_1_isotig03646 | 294  | SS* |
| 169 | Astacin protease NAS-9                      | ZnMc_astacin_like            | Hpb_Ad_1_isotig00213 | 254  | SS* |
| 217 | Astacin protease NAS-10                     | ZnMc_astacin_like            | Hpb_Ad_1_isotig07968 | 147  | SS* |
| 256 | Astacin protease NAS-11                     | ZnMc_astacin_like            | Hpb_Ad_1_isotig06298 | 101  | SS* |
| 269 | Astacin protease NAS-12.1                   | ZnMc_astacin_like            | Hpb_Ad_1_isotig01323 | 92   | SS* |
| 272 | Astacin protease NAS-12.2                   | ZnMc_astacin_like            | Hpb_Ad_1_isotig01325 | 91   | SS* |
| 53  | Astacin protease family member (fragment)   | None                         | Hpb_Ad_1_isotig01219 | 956  | SS* |
| 161 | Astacin protease family member (fragment)   | None                         | Hpb_Ad_1_isotig18617 | 262  | SS  |
| 362 | C-type lectin                               | CLECT                        | Hpb_Ad_1_isotig07296 | 38   | SS  |
| 330 | C-type lectin (fragment)                    | CLECT                        | Hpb_Ad_1_sing01928   | 53   | SS* |
| 126 | C-type lectin mannose receptor-like         | CLECT (Double)               | Hpb_Ad_1_isotig00496 | 366  | SS  |
| 331 | Calmodulin                                  | EFh (Double)                 | Hpb_Ad_1_isotig07710 | 53   | NO  |
| 302 | Calreticulin                                | Calreticulin                 | Hpb-CRT              | 74   | SS  |
| 351 | Catalase                                    | Catalase_like                | Hpb_Ad_1_isotig06077 | 43   | NO  |
| 172 | Cathepsin A                                 | Peptidase_S10                | Hpb_Ad_1_isotig06324 | 248  | SS  |
| 306 | Cathepsin A                                 | Peptidase_S10                | Hpb_Ad_1_isotig07455 | 69   | SS* |
| 215 | Cathepsin B-like cysteine protease          | Peptidase_C1                 | Hpb_Ad_1_isotig07017 | 147  | SS  |
| 224 | CCP-domain containing protein               | CCP                          | Hpb_Ad_1_isotig17372 | 135  | SS  |
| 236 | CCP-domain containing protein               | CCP                          | Hpb_Ad_1_isotig02616 | 115  | SS  |
| 284 | CCP-domain containing protein               | CCP                          | Hpb_Ad_1_isotig02055 | 83   | SS* |
| 27  | Chitin binding Peritrophin-A domain protein | Chitin-binding domain type 2 | Hpb_Ad_1_isotig05677 | 1561 | SS* |
| 52  | Chitinase                                   | Chitinase_glyco_hydro_19     | Hpb_Ad_1_isotig04840 | 988  | SS  |
| 74  | Chondroitin family member                   | NO CONSERVED DOMAINS         | Hpb_Ad_1_isotig01493 | 710  | SS  |
| 151 | Chondroitin family member                   | CBM_14 (Triple)              | Hpb_Ad_1_isotig06559 | 284  | SS* |
| 287 | Chondroitin family member                   | None                         | Hpb_Ad_1_isotig08745 | 82   | SS  |

|     |                                                       |      |                      |     |     |
|-----|-------------------------------------------------------|------|----------------------|-----|-----|
| 322 | Chondroitin family member                             | None | Hpb_Ad_1_isotig01171 | 55  | SS  |
| 324 | Chondroitin family member                             | None | Hpb_Ad_1_isotig02806 | 54  | SS  |
| 334 | Chondroitin family member                             | None | Hpb_Ad_1_isotig04525 | 51  | SS  |
| 300 | Claudin-like protein                                  | None | Hpb_Ad_1_isotig10277 | 74  | SS* |
| 84  | Complement regulatory protein                         | CCP  | Hpb_Ad_1_isotig13827 | 632 | SS  |
| 86  | Complement regulatory protein                         | CCP  | Hpb_Ad_1_isotig12552 | 611 | SS* |
| 112 | Complement related short precursor                    | None | Hpb_Ad_1_isotig00942 | 423 | SS  |
| 128 | Complement related short precursor                    | None | Hpb_Ad_1_isotig00938 | 358 | SS  |
| 130 | CSN-1 Conserved Secreted protein, No signal peptide   | None | Hpb_Ad_1_isotig04564 | 344 | NO  |
| 230 | CSN-2 Conserved Secreted protein, No signal peptide   | None | Hpb_Ad_1_isotig04423 | 127 | NO  |
| 297 | CSN-3 Conserved Secreted protein, No signal peptide   | None | Hpb_Ad_1_sing15506   | 78  | NO  |
| 336 | CSN-4 Conserved Secreted protein, No signal peptide   | None | Hpb_Ad_1_isotig12802 | 51  | NO  |
| 350 | CSN-5 Conserved Secreted protein, No signal peptide   | None | Hpb_Ad_1_isotig03664 | 43  | NO  |
| 96  | CSP-1 Conserved secreted protein with Signal Peptide  | None | Hpb_Ad_1_isotig13235 | 528 | SS* |
| 99  | CSP-2 Conserved secreted protein with Signal Peptide  | None | Hpb_Ad_1_isotig09016 | 502 | SS  |
| 107 | CSP-3 Conserved secreted protein with Signal Peptide  | None | Hpb_Ad_1_isotig16457 | 457 | SS  |
| 110 | CSP-4 Conserved secreted protein with Signal Peptide  | None | Hpb_Ad_1_isotig13290 | 428 | SS  |
| 111 | CSP-5 Conserved secreted protein with Signal Peptide  | None | Hpb_Ad_1_isotig15172 | 423 | SS  |
| 163 | CSP-6 Conserved secreted protein with Signal Peptide  | None | Hpb_Ad_1_isotig13004 | 261 | SS  |
| 177 | CSP-7 Conserved secreted protein with Signal Peptide  | None | Hpb_Ad_1_isotig13458 | 242 | SS  |
| 190 | CSP-8 Conserved secreted protein with Signal Peptide  | None | Hpb_Ad_1_sing00568   | 200 | SS* |
| 200 | CSP-9 Conserved secreted protein with Signal Peptide  | None | Hpb_Ad_1_isotig09761 | 192 | SS* |
| 204 | CSP-10 Conserved secreted protein with Signal Peptide | None | Hpb_Ad_1_isotig13653 | 176 | SS* |
| 216 | CSP-11 Conserved secreted protein with Signal Peptide | None | Hpb_Ad_1_isotig14016 | 147 | SS  |
| 249 | CSP-12 Conserved secreted protein with Signal Peptide | None | Hpb_Ad_1_isotig09063 | 106 | SS  |
| 250 | CSP-13 Conserved secreted protein with Signal Peptide | None | Hpb_Ad_1_isotig09363 | 106 | SS  |
| 261 | CSP-14 Conserved secreted protein with Signal Peptide | None | Hpb_Ad_1_isotig05150 | 96  | SS  |
| 274 | CSP-15 Conserved secreted protein with Signal Peptide | None | Hpb_Ad_1_isotig03724 | 90  | SS  |
| 292 | CSP-16 Conserved secreted protein with Signal Peptide | None | Hpb_Ad_1_isotig04467 | 80  | SS* |
| 293 | CSP-17 Conserved secreted protein with Signal Peptide | None | Hpb_Ad_1_isotig18632 | 80  | SS* |
| 304 | CSP-18 Conserved secreted protein with Signal Peptide | None | Hpb_Ad_1_isotig05540 | 71  | SS  |
| 310 | CSP-19 Conserved secreted protein with Signal Peptide | None | Hpb_Ad_1_isotig05817 | 65  | SS  |
| 314 | CSP-20 Conserved secreted protein with Signal Peptide | None | Hpb_Ad_1_isotig13240 | 60  | SS  |
| 353 | CSP-21 Conserved secreted protein with Signal Peptide | None | Hpb_Ad_1_isotig02800 | 43  | SS  |
| 354 | CSP-22 Conserved secreted protein with Signal Peptide | None | Hpb_Ad_1_sing12214   | 42  | SS* |

|     |                                                         |                                  |                      |      |     |
|-----|---------------------------------------------------------|----------------------------------|----------------------|------|-----|
| 356 | CSP-23 Conserved secreted protein with Signal Peptide   | None                             | Hpb_Ad_1_isotig16100 | 39   | SS* |
| 363 | CSP-24 Conserved secreted protein with Signal Peptide   | None                             | Hpb_Ad_1_isotig05262 | 36   | SS  |
| 366 | CSP-25 Conserved secreted protein with Signal Peptide   | None                             | Hpb_Ad_1_isotig07912 | 36   | SS  |
| 166 | Cyclophilin                                             | Cyclophilin                      | Hpb_Ad_1_isotig11124 | 256  | NO  |
| 241 | Cyclophilin                                             | Cyclophilin                      | Hpb_Ad_1_isotig09088 | 111  | SS  |
| 162 | Cystatin                                                | CY                               | Hpb_Ad_1_isotig02700 | 261  | SS  |
| 158 | Cysteine protease (necpain)                             | Peptidase C1A Cathepsin B        | Hpb_Ad_1_isotig07654 | 265  | SS  |
| 337 | Cytochrome C                                            | Cytochrome C                     | Hpb_Ad_1_isotig11144 | 50   | NO  |
| 50  | Deoxyribonuclease II family member                      | Dnase II                         | Hpb_Ad_1_isotig08122 | 1006 | SS* |
| 103 | Dipeptidyl Peptidase Four (IV) family member (fragment) | Esterase lipase                  | Hpb_Ad_1_isotig04148 | 479  | NO  |
| 137 | Dipeptidyl Peptidase Four (IV) family member (fragment) | None                             | Hpb_Ad_1_sing02304   | 324  | NO  |
| 335 | Dipeptidyl Peptidase Four (IV) family member (fragment) | None                             | Hpb_Ad_1_sing07688   | 51   | NO  |
| 199 | DOMON domain containing protein                         | DOMON                            | Hpb_Ad_1_isotig05113 | 192  | SS  |
| 267 | DOMON domain containing protein                         | DOMON                            | Hpb_Ad_1_isotig11195 | 93   | SS  |
| 229 | DUF1261 domain containing protein                       | DUF1261                          | Hpb_Ad_1_isotig11817 | 128  | SS* |
| 263 | DUF1261 domain containing protein                       | DUF1261                          | Hpb_Ad_1_isotig10529 | 95   | SS  |
| 264 | DUF1261 domain containing protein                       | DUF1261                          | Hpb_Ad_1_isotig05135 | 95   | SS  |
| 326 | DUF1261 domain containing protein                       | DUF1261                          | Hpb_Ad_1_isotig14147 | 54   | SS* |
| 170 | DUF148 domain containing protein                        | DUF148                           | Hpb_Ad_1_isotig12370 | 252  | SS* |
| 367 | Dyenin light chain (fragment)                           | Dyenin light                     | Hpb_Ad_1_isotig08463 | 35   | NO  |
| 64  | Enolase                                                 | Enolase                          | Hpb_Ad_1_isotig06965 | 826  | NO  |
| 136 | Enolase (fragment)                                      | TIM phosphate-binding            | Hpb_Ad_1_isotig18996 | 326  | NO  |
| 296 | ERM family member                                       | B41 multidomain; ERM multidomain | Hpb_Ad_1_isotig02815 | 79   | NO  |
| 323 | Esterase-lipase domain containing protein (fragment)    | Esterase lipase                  | Hpb_Ad_1_sing03585   | 55   | NO  |
| 349 | Eukaryotic translation elongation factor 1A             | EF-1 alpha multidomain           | Hpb_Ad_1_isotig02523 | 44   | NO  |
| 278 | Eukaryotic translation elongation factor 2              | PTZ00416 multidomain             | Hpb_Ad_1_isotig05363 | 86   | NO  |
| 207 | Evr1-Alr family protein                                 | Evr1 Alr superfamily             | Hpb_Ad_1_isotig05952 | 170  | SS* |
| 91  | Fatty acid and retinol binding protein                  | Gp-FAR-1                         | Hpb_Ad_1_isotig11475 | 577  | SS* |
| 305 | Fatty acid and retinol binding protein (fragment)       | Gp-FAR-1                         | Hpb_Ad_1_sing12372   | 71   | SS* |
| 234 | Ferritin                                                | Ferritin_like                    | Hpb_Ad_1_isotig15727 | 117  | NO  |
| 134 | Galectin                                                | GLECT (Double)                   | Hpb_Ad_1_isotig07456 | 334  | NO  |
| 211 | Galectin                                                | GLECT (Double)                   | Hpb_Ad_1_isotig07026 | 163  | NO  |
| 233 | Galectin                                                | GLECT (Double)                   | Hpb_Ad_1_isotig09082 | 120  | NO  |
| 288 | Galectin                                                | GLECT                            | Hpb_Ad_1_isotig09713 | 81   | NO  |
| 343 | Galectin                                                | GLECT                            | Hpb_Ad_1_isotig11886 | 47   | NO  |

|     |                                      |                                 |                      |      |     |
|-----|--------------------------------------|---------------------------------|----------------------|------|-----|
| 183 | Glutathione S-transferase            | PTZ00057 multidomain            | Hpb_Ad_1_isotig11588 | 219  | NO  |
| 345 | Glutathione S-transferase            | PTZ00057 multidomain            | Hpb_Ad_1_isotig10292 | 47   | NO  |
| 108 | Glutathione S-transferase 2          | PTZ00057 multidomain            | Hpb-GST-2 (AF128959) | 453  | NO  |
| 248 | Glycosyl hydrolase family 31 protein | GH31 (Double)                   | Hpb_Ad_1_isotig07314 | 107  | SS* |
| 92  | Hexokinase                           | Hexokinase 1; Hexokinase 2      | Hpb_Ad_1_isotig05973 | 563  | NO  |
| 282 | Histidine acid phosphatase           | HP HAP-like                     | Hpb_Ad_1_isotig06890 | 84   | SS* |
| 141 | Histone                              | H2A                             | Hpb_Ad_1_isotig11690 | 317  | NO  |
| 311 | Histone                              | H2A                             | Hpb_Ad_1_isotig13099 | 65   | NO  |
| 329 | Histone                              | H2A                             | Hpb_Ad_1_isotig13367 | 53   | NO  |
| 196 | HSP60                                | GroEL                           | Hpb_Ad_1_isotig06093 | 195  | NO  |
| 257 | HSP70                                | PTZ00009 multidomain            | Hpb_Ad_1_isotig07134 | 100  | NO  |
| 214 | HSP70 (fragment)                     | PTZ00009 multidomain            | Hpb_Ad_1_isotig13132 | 148  | NO  |
| 266 | Hyaluronidase                        | Glyco hydro 56                  | Hpb_Ad_1_isotig07073 | 94   | SS* |
| 341 | Independent phosphoglycerate mutase  | Sulfatase                       | Hpb_Ad_1_isotig01699 | 48   | NO  |
| 127 | Keratin-like protein                 | DUF148                          | Hpb_Ad_1_isotig04028 | 365  | SS  |
| 231 | Keratin-like protein                 | DUF148                          | Hpb_Ad_1_isotig11509 | 127  | SS* |
| 355 | Keratin-like protein                 | DUF148                          | Hpb_Ad_1_isotig11580 | 40   | SS* |
| 155 | Kunitz inhibitor                     | KU                              | Hpb_Ad_1_isotig01217 | 273  | SS  |
| 237 | Kunitz inhibitor                     | KU                              | Hpb_Ad_1_isotig18024 | 115  | SS  |
| 239 | Kunitz inhibitor                     | KU                              | Hpb_Ad_1_isotig17776 | 113  | SS  |
| 277 | Kunitz inhibitor                     | KU                              | Hpb_Ad_1_isotig00584 | 88   | SS  |
| 286 | Kunitz inhibitor                     | KU                              | Hpb_Ad_1_isotig02721 | 82   | SS  |
| 298 | Kunitz inhibitor                     | KU                              | Hpb_Ad_1_isotig10130 | 77   | SS  |
| 369 | Kunitz inhibitor                     | KU                              | Hpb_Ad_1_isotig02378 | 35   | SS  |
| 312 | Legumain-like protein                | Peptidase C13                   | Hpb_Ad_1_isotig01389 | 62   | SS* |
| 316 | Legumain-like protein                | Peptidase C13                   | Hpb_Ad_1_isotig06842 | 59   | SS* |
| 156 | Lipase family protein                | Lipase 3                        | Hpb_Ad_1_isotig07987 | 268  | SS* |
| 235 | Lipase-like protein                  | Abhydro lipase; Esterase lipase | Hpb_Ad_1_isotig03824 | 116  | SS  |
| 252 | Lipocalin domain containing protein  | Lipocalin                       | Hpb_Ad_1_isotig05316 | 104  | SS  |
| 8   | LYS-1 Lysozyme                       | Muramidase GH25                 | Hpb_Ad_1_isotig08802 | 3615 | SS  |
| 12  | LYS-2 Lysozyme                       | Muramidase GH25                 | Hpb_Ad_1_isotig05074 | 2947 | SS  |
| 79  | LYS-3 Lysozyme                       | Muramidase GH25                 | Hpb_Ad_1_isotig08606 | 683  | SS* |
| 174 | LYS-4 Lysozyme                       | Muramidase GH25                 | Hpb_Ad_1_isotig03666 | 246  | SS  |
| 178 | LYS-5 Lysozyme                       | Muramidase GH25                 | Hpb_Ad_1_isotig08740 | 242  | SS  |
| 188 | LYS-6 Lysozyme                       | Muramidase GH25                 | Hpb_Ad_1_isotig14122 | 210  | SS  |

|     |                                                  |                 |                      |      |     |
|-----|--------------------------------------------------|-----------------|----------------------|------|-----|
| 221 | LYS-7 Lysozyme                                   | Muramidase GH25 | Hpb_Ad_1_isotig08406 | 141  | SS  |
| 262 | LYS-8 Lysozyme                                   | Muramidase GH25 | Hpb_Ad_1_isotig13335 | 96   | SS* |
| 167 | Macrophage migration inhibitory factor           | MIF             | Hpb_Ad_1_isotig14093 | 256  | NO  |
| 36  | Major Sperm Protein                              | Motile Sperm    | Hpb_Ad_1_isotig01565 | 1278 | NO  |
| 348 | Malate dehydrogenase                             | LDH MDH-like    | Hpb_Ad_1_isotig05076 | 44   | SS* |
| 187 | MD / EGF CA domain-containing protein            | MD; EGF CA      | Hpb_Ad_1_isotig02190 | 210  | SS* |
| 194 | MD / vWFA domain-containing protein              | MD; vWFA        | Hpb_Ad_1_isotig02191 | 197  | SS* |
| 290 | MD-domain containing protein (fragment)          | MD              | Hpb_Ad_1_sing04917   | 81   | SS* |
| 60  | MFH-1 Ascaris MFP2b homologue                    | MFP2b           | Hpb_Ad_1_isotig07283 | 845  | NO  |
| 82  | MFH-2 Ascaris MFP2b homologue                    | MFP2b           | Hpb_Ad_1_isotig07373 | 647  | NO  |
| 105 | MFH-3 Ascaris MFP2b homologue                    | MFP2b           | Hpb_Ad_1_isotig07980 | 463  | NO  |
| 360 | MFH-4 Ascaris MFP2b homologue                    | MFP2b           | Hpb_Ad_1_isotig02603 | 38   | NO  |
| 244 | ML-domain containing protein                     | ML              | Hpb_Ad_1_isotig10098 | 110  | SS  |
| 182 | Motile_Sperm domain containing protein           | Motile_Sperm    | Hpb_Ad_1_isotig16375 | 220  | NO  |
| 205 | Motile_Sperm domain containing protein           | Motile_Sperm    | Hpb_Ad_1_isotig16097 | 175  | NO  |
| 222 | Motile_Sperm domain containing protein           | Motile_Sperm    | Hpb_Ad_1_isotig16212 | 138  | NO  |
| 26  | Myoglobin                                        | Globin          | Hpb_Ad_1_isotig04274 | 1579 | SS  |
| 32  | Myoglobin                                        | Globin          | Hpb_Ad_1_isotig11742 | 1446 | SS  |
| 34  | Myoglobin                                        | Globin          | Hpb_Ad_1_isotig04273 | 1390 | SS  |
| 46  | Myoglobin                                        | Globin          | Hpb_Ad_1_isotig05169 | 1094 | SS  |
| 78  | Myoglobin                                        | Globin          | Hpb_Ad_1_isotig11666 | 683  | SS  |
| 117 | Myoglobin                                        | Globin          | Hpb_Ad_1_isotig11356 | 398  | SS* |
| 114 | Myoglobin (fragment)                             | None            | Hpb_Ad_1_isotig19571 | 415  | SS* |
| 30  | Nematode polyprotein allergen                    | None            | Hpb_Ad_1_isotig02438 | 1498 | SS  |
| 72  | NSN-1 Novel Secreted protein, No signal peptide  | None            | Hpb_Ad_1_isotig18405 | 777  | NO  |
| 90  | NSN-2 Novel Secreted protein, No signal peptide  | None            | Hpb_Ad_1_isotig14195 | 589  | NO  |
| 160 | NSN-3 Novel Secreted protein, No signal peptide  | None            | Hpb_Ad_1_isotig17079 | 263  | NO  |
| 164 | NSN-4 Novel Secreted protein, No signal peptide  | None            | Hpb_Ad_1_isotig08805 | 260  | NO  |
| 176 | NSN-5 Novel Secreted protein, No signal peptide  | None            | Hpb_Ad_1_isotig18558 | 242  | NO  |
| 243 | NSN-6 Novel Secreted protein, No signal peptide  | None            | Hpb_Ad_1_isotig12574 | 110  | NO  |
| 346 | NSN-7 Novel Secreted protein, No signal peptide  | None            | Hpb_Ad_1_isotig04967 | 46   | NO  |
| 358 | NSN-8 Novel Secreted protein, No signal peptide  | None            | Hpb_Ad_1_sing15995   | 38   | NO  |
| 364 | NSN-9 Novel Secreted protein, No signal peptide  | None            | Hpb_Ad_1_isotig18369 | 36   | NO  |
| 370 | NSN-10 Novel Secreted protein, No signal peptide | None            | Hpb_Ad_1_isotig04069 | 33   | NO  |
| 24  | NSP-1 Novel secreted protein with Signal Peptide | None            | Hpb_Ad_1_isotig11973 | 1584 | SS  |

|     |                                                   |      |                      |     |    |
|-----|---------------------------------------------------|------|----------------------|-----|----|
| 69  | NSP-2 Novel secreted protein with Signal Peptide  | None | Hpb_Ad_1_isotig12022 | 802 | SS |
| 70  | NSP-3 Novel secreted protein with Signal Peptide  | None | Hpb_Ad_1_isotig12137 | 802 | SS |
| 81  | NSP-4 Novel secreted protein with Signal Peptide  | None | Hpb_Ad_1_isotig05257 | 681 | SS |
| 87  | NSP-5 Novel secreted protein with Signal Peptide  | None | Hpb_Ad_1_isotig12800 | 599 | SS |
| 88  | NSP-6 Novel secreted protein with Signal Peptide  | None | Hpb_Ad_1_isotig12832 | 596 | SS |
| 89  | NSP-7 Novel secreted protein with Signal Peptide  | None | Hpb_Ad_1_isotig12576 | 592 | SS |
| 93  | NSP-8 Novel secreted protein with Signal Peptide  | None | Hpb_Ad_1_isotig16252 | 557 | SS |
| 94  | NSP-9 Novel secreted protein with Signal Peptide  | None | Hpb_Ad_1_isotig09200 | 529 | SS |
| 104 | NSP-10 Novel secreted protein with Signal Peptide | None | Hpb_Ad_1_isotig11963 | 468 | SS |
| 115 | NSP-11 Novel secreted protein with Signal Peptide | None | Hpb_Ad_1_isotig10785 | 411 | SS |
| 121 | NSP-12 Novel secreted protein with Signal Peptide | None | Hpb_Ad_1_isotig12761 | 375 | SS |
| 122 | NSP-13 Novel secreted protein with Signal Peptide | None | Hpb_Ad_1_isotig04332 | 373 | SS |
| 123 | NSP-14 Novel secreted protein with Signal Peptide | None | Hpb_Ad_1_isotig11904 | 371 | SS |
| 124 | NSP-15 Novel secreted protein with Signal Peptide | None | Hpb_Ad_1_isotig12691 | 369 | SS |
| 132 | NSP-16 Novel secreted protein with Signal Peptide | None | Hpb_Ad_1_isotig11873 | 339 | SS |
| 135 | NSP-17 Novel secreted protein with Signal Peptide | None | Hpb_Ad_1_isotig01555 | 331 | SS |
| 139 | NSP-18 Novel secreted protein with Signal Peptide | None | Hpb_Ad_1_isotig05245 | 317 | SS |
| 140 | NSP-19 Novel secreted protein with Signal Peptide | None | Hpb_Ad_1_isotig10773 | 317 | SS |
| 143 | NSP-20 Novel secreted protein with Signal Peptide | None | Hpb_Ad_1_isotig07000 | 315 | SS |
| 145 | NSP-21 Novel secreted protein with Signal Peptide | None | Hpb_Ad_1_isotig16202 | 311 | SS |
| 148 | NSP-22 Novel secreted protein with Signal Peptide | None | Hpb_Ad_1_isotig12388 | 297 | SS |
| 165 | NSP-23 Novel secreted protein with Signal Peptide | None | Hpb_Ad_1_isotig02071 | 257 | SS |
| 171 | NSP-24 Novel secreted protein with Signal Peptide | None | Hpb_Ad_1_isotig02755 | 250 | SS |
| 181 | NSP-25 Novel secreted protein with Signal Peptide | None | Hpb_Ad_1_isotig12964 | 228 | SS |
| 186 | NSP-26 Novel secreted protein with Signal Peptide | None | Hpb_Ad_1_isotig11916 | 212 | SS |
| 191 | NSP-27 Novel secreted protein with Signal Peptide | None | Hpb_Ad_1_isotig01550 | 200 | SS |
| 193 | NSP-28 Novel secreted protein with Signal Peptide | None | Hpb_Ad_1_isotig03992 | 198 | SS |
| 195 | NSP-29 Novel secreted protein with Signal Peptide | None | Hpb_Ad_1_isotig13553 | 197 | SS |
| 197 | NSP-30 Novel secreted protein with Signal Peptide | None | Hpb_Ad_1_isotig12701 | 194 | SS |
| 202 | NSP-31 Novel secreted protein with Signal Peptide | None | Hpb_Ad_1_isotig11681 | 188 | SS |
| 208 | NSP-32 Novel secreted protein with Signal Peptide | None | Hpb_Ad_1_isotig12755 | 167 | SS |
| 209 | NSP-33 Novel secreted protein with Signal Peptide | None | Hpb_Ad_1_isotig06181 | 166 | SS |
| 218 | NSP-34 Novel secreted protein with Signal Peptide | None | Hpb_Ad_1_isotig12710 | 145 | SS |
| 223 | NSP-35 Novel secreted protein with Signal Peptide | None | Hpb_Ad_1_isotig04118 | 136 | SS |
| 228 | NSP-36 Novel secreted protein with Signal Peptide | None | Hpb_Ad_1_isotig15557 | 128 | SS |



|     |                                                   |                      |                      |      |      |
|-----|---------------------------------------------------|----------------------|----------------------|------|------|
| 232 | NSP-37 Novel secreted protein with Signal Peptide | None                 | Hpb_Ad_1_isotig11755 | 121  | SS   |
| 238 | NSP-38 Novel secreted protein with Signal Peptide | None                 | Hpb_Ad_1_isotig12243 | 115  | SS   |
| 246 | NSP-39 Novel secreted protein with Signal Peptide | None                 | Hpb_Ad_1_isotig16333 | 108  | SS   |
| 258 | NSP-40 Novel secreted protein with Signal Peptide | None                 | Hpb_Ad_1_isotig17875 | 99   | SS   |
| 259 | NSP-41 Novel secreted protein with Signal Peptide | None                 | Hpb_Ad_1_isotig17793 | 98   | SS   |
| 265 | NSP-42 Novel secreted protein with Signal Peptide | None                 | Hpb_Ad_1_isotig12577 | 94   | SS   |
| 270 | NSP-43 Novel secreted protein with Signal Peptide | None                 | Hpb_Ad_1_isotig15139 | 92   | SS   |
| 273 | NSP-44 Novel secreted protein with Signal Peptide | None                 | Hpb_Ad_1_isotig12049 | 91   | SS   |
| 275 | NSP-45 Novel secreted protein with Signal Peptide | None                 | Hpb_Ad_1_isotig16925 | 89   | SS   |
| 276 | NSP-46 Novel secreted protein with Signal Peptide | None                 | Hpb_Ad_1_isotig11980 | 89   | SS   |
| 283 | NSP-47 Novel secreted protein with Signal Peptide | None                 | Hpb_Ad_1_isotig13627 | 83   | SS   |
| 294 | NSP-48 Novel secreted protein with Signal Peptide | None                 | Hpb_Ad_1_isotig12083 | 80   | SS   |
| 301 | NSP-49 Novel secreted protein with Signal Peptide | None                 | Hpb_Ad_1_isotig17751 | 74   | SS   |
| 308 | NSP-50 Novel secreted protein with Signal Peptide | None                 | Hpb_Ad_1_isotig10636 | 66   | SS   |
| 315 | NSP-51 Novel secreted protein with Signal Peptide | None                 | Hpb_Ad_1_isotig11357 | 60   | SS   |
| 319 | NSP-52 Novel secreted protein with Signal Peptide | None                 | Hpb_Ad_1_isotig12335 | 58   | SS   |
| 320 | NSP-53 Novel secreted protein with Signal Peptide | None                 | Hpb_Ad_1_isotig01125 | 56   | SS   |
| 332 | NSP-54 Novel secreted protein with Signal Peptide | None                 | Hpb_Ad_1_isotig02368 | 52   | SS   |
| 340 | NSP-55 Novel secreted protein with Signal Peptide | None                 | Hpb_Ad_1_isotig13626 | 48   | SS   |
| 342 | NSP-56 Novel secreted protein with Signal Peptide | None                 | Hpb_Ad_1_isotig04317 | 47   | SS   |
| 344 | NSP-57 Novel secreted protein with Signal Peptide | None                 | Hpb_Ad_1_isotig09936 | 47   | SS   |
| 352 | NSP-58 Novel secreted protein with Signal Peptide | None                 | Hpb_Ad_1_isotig16618 | 43   | SS   |
| 361 | NSP-59 Novel secreted protein with Signal Peptide | None                 | Hpb_Ad_1_isotig13319 | 38   | SS   |
| 365 | NSP-60 Novel secreted protein with Signal Peptide | None                 | Hpb_Ad_1_isotig09979 | 36   | SS   |
| 106 | Nucleoside diphosphate kinase                     | NDPk_I               | Hpb_Ad_1_isotig05236 | 462  | SS   |
| 279 | PHA02639 domain containing protein                | PHA02639             | Hpb_Ad_1_isotig08060 | 86   | SS   |
| 44  | PHA02954 domain containing protein                | PHA02954             | Hpb_Ad_1_isotig03547 | 1120 | SS   |
| 198 | PHA02954 domain containing protein                | PHA02954             | Hpb_Ad_1_isotig11322 | 192  | SS** |
| 254 | PHA02954 domain containing protein                | PHA02954             | Hpb_Ad_1_isotig16931 | 103  | SS** |
| 309 | PHA02954 domain containing protein                | PHA02954             | Hpb_Ad_1_isotig08016 | 66   | SS   |
| 133 | Phosphatidylethanolamine binding protein          | PEBP euk             | Hpb_Ad_1_isotig05126 | 339  | SS   |
| 339 | Phospholipase A2                                  | PLA2c                | Hpb_Ad_1_isotig04018 | 49   | SS   |
| 201 | Phospholipase D                                   | PLDc (Double)        | Hpb_Ad_1_isotig05688 | 191  | NO   |
| 299 | PIWI-domain containing protein                    | PIWI-like            | Hpb_Ad_1_isotig04875 | 77   | NO   |
| 192 | PLN02980 multidomain containing protein           | PLN02980 multidomain | Hpb_Ad_1_isotig14562 | 199  | SS   |



|     |                                                      |                            |                      |      |      |
|-----|------------------------------------------------------|----------------------------|----------------------|------|------|
| 102 | Poly(U)specific endoribonuclease                     | XendoU (Double)            | Hpb_Ad_1_isotig05789 | 497  | SS   |
| 303 | Propylcarboxypeptidase                               | Esterase lipase            | Hpb_Ad_1_isotig07006 | 73   | SS*  |
| 226 | Protein disulfide isomerase                          | ER PDI fam multidomain     | Hpb_Ad_1_isotig05787 | 133  | SS   |
| 289 | Protein disulfide isomerase                          | PDI multidomain            | Hpb_Ad_1_isotig01916 | 81   | SS*  |
| 325 | Rab GDP dissociation inhibitor                       | GDI                        | Hpb_Ad_1_isotig06129 | 54   | NO   |
| 372 | Retinol-binding protein                              | Gp-FAR-1                   | Hpb-RBP              | 29   | SS   |
| 247 | Ribosomal protein 60S L40 / Ubiquitin fusion protein | Ribosomal L40e; Ubiquitin  | Hpb_Ad_1_isotig13199 | 108  | NO   |
| 359 | Ribosomal protein 60S P0                             | Ribosomal P0 L10e          | Hpb_Ad_1_isotig01358 | 38   | NO   |
| 271 | Scavenger receptor homolog                           | CD36                       | Hpb_Ad_1_isotig08123 | 92   | SS*  |
| 318 | Scavenger receptor homolog                           | CD36                       | Hpb_Ad_1_isotig05891 | 58   | SS   |
| 95  | Serine carboxypeptidase                              | Esterase lipase            | Hpb_Ad_1_isotig05975 | 529  | SS   |
| 253 | Serine carboxypeptidase                              | Esterase lipase            | Hpb_Ad_1_isotig06064 | 104  | SS** |
| 368 | Serine carboxypeptidase                              | Peptidase S10              | Hpb_Ad_1_isotig06714 | 35   | SS   |
| 97  | Serpin                                               | Serpin                     | Hpb_Ad_1_isotig08233 | 512  | NO   |
| 153 | Serpin                                               | Serpin                     | Hpb_Ad_1_isotig02225 | 281  | NO   |
| 175 | Serpin                                               | Serpin                     | Hpb_Ad_1_isotig07410 | 242  | NO   |
| 179 | Superoxide dismutase                                 | Cu-Zn Superoxide Dismutase | Hpb_Ad_1_isotig09104 | 235  | NO   |
| 327 | Superoxide dismutase                                 | Cu-Zn Superoxide Dismutase | Hpb_Ad_1_isotig10272 | 54   | NO   |
| 203 | SXC-1 (fragment)                                     | None                       | Hpb_Ad_1_isotig17658 | 183  | SS   |
| 373 | Thioredoxin                                          | Thioredoxin-like           | Hpb_Ad_1_isotig11056 | 28   | NO   |
| 101 | Thioredoxin peroxidase                               | Thioredoxin-like           | Hpb_Ad_1_isotig05188 | 498  | NO   |
| 260 | TIL domain containing protein                        | TIL                        | Hpb_Ad_1_isotig00779 | 98   | SS*  |
| 317 | Transaldolase                                        | Transaldolase Ta1AB        | Hpb_Ad_1_isotig07176 | 59   | NO   |
| 154 | Triose phosphate isomerase                           | TIM phosphate binding      | Hpb_Ad_1_isotig05016 | 276  | NO   |
| 54  | Trypsin family protein                               | Tryp_SPc                   | Hpb_Ad_1_isotig03474 | 919  | NO   |
| 57  | Trypsin family protein                               | Tryp_SPc                   | Hpb_Ad_1_isotig03473 | 883  | NO   |
| 125 | Trypsin family protein                               | TryP_SPc                   | Hpb_Ad_1_isotig02625 | 369  | SS   |
| 16  | TTR-1 Transthyretin-related protein                  | DUF290                     | Hpb_Ad_1_isotig04612 | 2130 | SS   |
| 41  | TTR-2 Transthyretin-related protein                  | DUF290                     | Hpb_Ad_1_isotig13558 | 1156 | SS   |
| 66  | TTR-3 Transthyretin-related protein                  | DUF290                     | Hpb_Ad_1_isotig14171 | 821  | SS   |
| 113 | TTR-4 Transthyretin-related protein                  | DUF290                     | Hpb_Ad_1_isotig04121 | 418  | SS   |
| 118 | TTR-5 Transthyretin-related protein                  | DUF290                     | Hpb_Ad_1_isotig13207 | 397  | SS   |
| 147 | TTR-6 Transthyretin-related protein                  | DUF290                     | Hpb_Ad_1_isotig05212 | 304  | SS   |
| 150 | TTR-7 Transthyretin-related protein                  | None                       | Hpb_Ad_1_isotig14043 | 286  | SS*  |
| 210 | TTR-8 Transthyretin-related protein                  | DUF290                     | Hpb_Ad_1_isotig13820 | 166  | SS   |

|     |                                      |                  |                       |      |     |
|-----|--------------------------------------|------------------|-----------------------|------|-----|
| 240 | TTR-9 Transthyretin-related protein  | DUF290           | Hpb_Ad_1_isotig12227  | 112  | SS  |
| 245 | TTR-10 Transthyretin-related protein | DUF290           | Hpb_Ad_1_isotig11792  | 108  | SS  |
| 285 | TTR-11 Transthyretin-related protein | DUF290           | Hpb_Ad_1_isotig04258  | 83   | SS  |
| 313 | TTR-12 Transthyretin-related protein | DUF290           | Hpb_Ad_1_isotig09798  | 61   | SS* |
| 374 | UNC-18                               | SEC1 multidomain | Hpb_Ad_1_isotig05626  | 27   | NO  |
| 1   | VAL-1.1                              | SCP (Double)     | Hpb_Ad_1_isotig06320  | 6546 | SS  |
| 2   | VAL-1.2                              | SCP (Double)     | Hpb_Ad_1_isotig03069  | 5788 | SS* |
| 13  | VAL-1.3                              | SCP (Double)     | Hpb_Ad_1_isotig06456  | 2668 | SS  |
| 17  | VAL-1.4                              | SCP (Double)     | Hpb_Ad_1_isotig01653  | 1841 | SS  |
| 23  | VAL-1.5                              | SCP (Double)     | Hpb_Ad_1_isotig01652  | 1596 | SS* |
| 58  | VAL-1.6 (incomplete)                 | SCP (Double)     | Hpb_Ad_1_isotig01655  | 867  | SS  |
| 212 | VAL-1.7 (incomplete)                 | SCP (Double)     | Hpb_Ad_1_isotig08291  | 160  | SS* |
| 6   | VAL-2.1                              | SCP (Double)     | Hpb_Ad_1_isotig03106  | 4003 | SS  |
| 3   | VAL-2.2                              | SCP (Double)     | Hpb_Ad_1_isotig07425  | 5149 | SS* |
| 4   | VAL-2.3                              | SCP (Double)     | Hpb_Ad_1_isotig03105  | 5039 | SS  |
| 5   | VAL-3.1                              | SCP (Double)     | Hpb_Ad_1_isotig05790  | 4754 | SS  |
| 157 | VAL-3.2 (incomplete)                 | SCP (Single)     | Hpb_Ad_1_isotig09998  | 265  | SS  |
| 21  | VAL-4                                | SCP (Single)     | Hpb_Ad_1_isotig10387  | 1770 | SS  |
| 73  | VAL-5                                | SCP (Double)     | Hpb_Ad_1_isotig04839  | 746  | SS  |
| 51  | VAL-6                                | SCP (Double)     | Hpb_Ad_1_isotig03505  | 996  | SS  |
| 15  | VAL-7.1                              | SCP (Single)     | Hpb_Ad_1_isotig01524  | 2593 | SS  |
| 9   | VAL-7.2                              | SCP (Single)     | Hpb_Ad_1_isotig01525  | 3369 | SS  |
| 11  | VAL-7.3                              | SCP (Single)     | Hpb_Ad_1_isotig02284  | 3051 | SS  |
| 14  | VAL-7.4                              | SCP (Single)     | Hpb_Ad_1_isotig02282  | 2604 | SS  |
| 10  | VAL-7.5                              | SCP (Single)     | Hpb_Ad_1_isotig01526  | 3367 | SS  |
| 40  | VAL-8.1                              | SCP (Double)     | Hpb_VAL-8, 02308-like | 1200 | SS  |
| 47  | VAL-8.2                              | SCP (Double)     | Hpb_Ad_1_isotig02308  | 1040 | SS* |
| 144 | VAL-8.3                              | SCP (Single)     | Hpb_Ad_1_isotig02309  | 313  | SS* |
| 33  | VAL-9                                | SCP (Double)     | Hpb_Ad_1_isotig05765  | 1431 | SS  |
| 142 | VAL-10                               | SCP (Single)     | Hpb_Ad_1_isotig04979  | 316  | SS  |
| 35  | VAL-11 (incomplete)                  | SCP (Double)     | Hpb_Ad_1_isotig05330  | 1303 | SS* |
| 68  | VAL-12                               | SCP (Double)     | Hpb_Ad_1_isotig06637  | 803  | SS  |
| 20  | VAL-13                               | SCP (Double)     | Hpb_Ad_1_isotig06642  | 1809 | SS  |
| 77  | VAL-14                               | SCP (Double)     | Hpb_Ad_1_isotig04896  | 689  | SS  |
| 225 | VAL-15                               | SCP (Single)     | Hpb_Ad_1_isotig02149  | 133  | SS  |

|     |                                |                               |                      |      |     |
|-----|--------------------------------|-------------------------------|----------------------|------|-----|
| 291 | VAL-16                         | SCP (Double)                  | Hpb_Ad_1_isotig04861 | 81   | SS  |
| 65  | VAL-17                         | SCP (Double)                  | Hpb_Ad_1_isotig05765 | 825  | SS* |
| 168 | VAL-18 (incomplete)            | SCP (Double)                  | Hpb_Ad_1_isotig07988 | 255  | SS* |
| 173 | VAL-19.1                       | SCP (Single)                  | Hpb_Ad_1_isotig01969 | 247  | SS  |
| 180 | VAL-19.2                       | SCP (Single)                  | Hpb_Ad_1_isotig01971 | 229  | SS  |
| 189 | VAL-20                         | SCP (Double)                  | Hpb_Ad_1_isotig03093 | 206  | SS  |
| 184 | VAL-21                         | SCP (Single)                  | Hpb_Ad_1_isotig09582 | 216  | SS  |
| 242 | VAL-22                         | None                          | Hpb_Ad_1_isotig09707 | 111  | SS  |
| 280 | VAL-23                         | SCP (Single)                  | Hpb_Ad_1_isotig09817 | 85   | SS* |
| 333 | VAL-24 (incomplete)            | SCP (Single)                  | Hpb_Ad_1_isotig10211 | 52   | SS* |
| 357 | VAL-25                         | SCP (Single)                  | Hpb_Ad_1_isotig10274 | 39   | SS  |
| 347 | VAL Unassigned (fragment)      | SCP                           | Hpb_Ad_1_sing07038   | 45   | SS* |
| 7   | Vitellogenin                   | DUF1943; Vitellogenin N       | Hpb_Ad_1_contig00471 | 3997 | SS  |
| 28  | Vitellogenin                   | DUF1943                       | Hpb_Ad_1_contig00207 | 1552 | SS* |
| 38  | Vitellogenin                   | Vitellogenin N                | Hpb_Ad_1_contig00203 | 1205 | SS* |
| 39  | Vitellogenin                   | VWD                           | Hpb_Ad_1_contig00477 | 1204 | SS* |
| 55  | Vitellogenin                   | VWD                           | Hpb_Ad_1_contig00212 | 918  | SS* |
| 75  | Vitellogenin                   | Vitellogenin N                | Hpb_Ad_1_contig00199 | 696  | SS  |
| 159 | Vitellogenin                   | None                          | Hpb_Ad_1_contig00211 | 263  | SS* |
| 220 | Vitellogenin (fragment)        | VWD                           | Hpb_Ad_1_contig00212 | 144  | SS* |
| 227 | Vitellogenin (fragment)        | Vitellogenin N                | Hpb_Ad_1_sing00711   | 131  | SS* |
| 321 | vWFA domain containing protein | vWFA                          | Hpb_Ad_1_isotig03936 | 55   | SS* |
| 338 | vWFA domain containing protein | vWFA                          | Hpb_Ad_1_isotig05915 | 50   | NO  |
| 22  | Zinc metalloprotease MEP-1     | Peptidase M13; Peptidase M13N | Hpb_Ad_1_isotig02967 | 1624 | SS* |
| 37  | Zinc metalloprotease MEP-2     | Pep0; Peptidase M13N          | Hpb_Ad_1_isotig05366 | 1232 | SS  |
| 48  | Zinc metalloprotease MEP-3     | Peptidase M13; Peptidase M13N | Hpb_Ad_1_isotig05155 | 1007 | SS* |
| 67  | Zinc metalloprotease MEP-4     | Peptidase M13; Peptidase M13N | Hpb_Ad_1_isotig05402 | 806  | SS  |
| 129 | Zinc metalloprotease MEP-5     | Peptidase M13N                | Hpb_Ad_1_isotig12816 | 349  | SS* |
