# Supplementary material
Source: PubMed Central journal article supplement (PMC4794625)
Supplement: NIHMS67505-supplement-Supplementary_Table_2.pdf [file NIHMS67505-supplement-Supplementary_Table_2.pdf]

**Supplementary Table 2**  
**Alphabetical Listing of Proteins identified in HEx**

| Rank | Identity                                         | Conserved domains              | Code        | Score | SP |
|------|--------------------------------------------------|--------------------------------|-------------|-------|----|
| 409  | 1,4-alpha-glucan branching enzyme                | Alpha-amylase; Alpha-amylase_C | isotig06050 | 43    | NO |
| 21   | 14-3-3 family member                             | 14-3-3                         | isotig07975 | 1218  | NO |
| 201  | 2A1904 domain containing protein                 | 2A1904                         | isotig00829 | 121   | SP |
| 427  | 3'-phosphoadenosine 5'-phosphosulfate synthase 2 | APSK; ATPS                     | isotig04804 | 39    | NO |
| 204  | 4-aminobutyrate aminotransferase                 | OAT_like                       | isotig02515 | 119   | NO |
| 215  | 4-hydroxyphenylpyruvate dioxygenase              | 4HPPD multidomain              | isotig03286 | 113   | NO |
| 33   | AAA family ATPase                                | CDC48 multidomain              | isotig05378 | 857   | NO |
| 196  | Acetyl CoA acetyltransferase                     | Thiolase                       | isotig06180 | 127   | NO |
| 219  | Acetyl CoA hydrolase-transferase                 | ACH1 multidomain               | isotig02985 | 111   | NO |
| 432  | Acetyl CoA transferase                           | cond_enzymes                   | isotig08630 | 38    | NO |
| 4    | Actin                                            | Actin                          | isotig01642 | 2585  | NO |
| 5    | Actin                                            | Actin                          | isotig01640 | 2251  | NO |
| 22   | Actin                                            | Actin                          | isotig08179 | 1212  | NO |
| 42   | Actin                                            | Actin                          | isotig08340 | 695   | NO |
| 178  | Actin depolymerising factor                      | ADF                            | isotig07522 | 144   | NO |
| 324  | Actin depolymerising factor                      | ADF                            | isotig17139 | 62    | NO |
| 239  | Acyl CoA dehydrogenase family member             | ACAD                           | isotig06933 | 95    | NO |
| 354  | Acyl CoA dehydrogenase family member             | ACAD                           | isotig08338 | 56    | NO |
| 90   | Adenosylhomocysteinase                           | NADB_Rossmann                  | isotig08907 | 308   | NO |
| 339  | Adenosylhomocysteinase (fragment)                | NADB_Rossmann                  | sing01044   | 59    | NO |
| 428  | Adenylate kinase                                 | ADK (Double)                   | isotig05326 | 39    | NO |
| 278  | ADP-ribosylation factor 1                        | Arf1_5_like                    | isotig07272 | 82    | NO |
| 274  | Alanyl-tRNA synthetase family member             | alas multidomain               | isotig05593 | 82    | NO |
| 452  | Alcohol dehydrogenase class III                  | MDR                            | isotig07935 | 34    | NO |
| 87   | Aldehyde dehydrogenase family member             | ALDH-SF                        | isotig04738 | 339   | NO |
| 138  | Aldehyde dehydrogenase family member             | ALDH_F6_MMDS                   | isotig06146 | 192   | NO |
| 300  | Aldehyde dehydrogenase family member             | ALDH_F7_AASADH                 | isotig05696 | 72    | NO |
| 387  | Aldehyde dehydrogenase family member             | ALDH-SF                        | isotig08696 | 48    | NO |
| 398  | Aldehyde dehydrogenase family member             | ALDH_F4-17_P5CDH               | isotig05345 | 45    | NO |
| 13   | Aldolase                                         | FBP_aldolase_I_a               | isotig04915 | 1611  | NO |
| 214  | Aldolase                                         | FBP_aldolase_I_a               | isotig04899 | 114   | NO |

|     |                                                |                                 |             |      |     |
|-----|------------------------------------------------|---------------------------------|-------------|------|-----|
| 38  | Alpha-tubulin                                  | Alpha-tubulin                   | isotig06550 | 736  | NO  |
| 59  | Alpha-tubulin                                  | Alpha-tubulin                   | isotig06165 | 512  | NO  |
| 98  | Alpha-tubulin                                  | Alpha-tubulin                   | isotig06090 | 282  | NO  |
| 310 | Aminopeptidase                                 | Peptidase_M17                   | sing15602   | 67   | NO  |
| 119 | ANChorage family member                        | SbcC multidomain                | isotig05396 | 231  | NO  |
| 422 | Animal haem peroxidase family member(fragment) | An_peroxidase multidomain       | sing01998   | 41   | SP* |
| 283 | Annexin family member                          | Annexin (Triple)                | isotig09212 | 79   | NO  |
| 39  | Arginine kinase                                | Arginine_kinase_like            | isotig06694 | 736  | NO  |
| 137 | Arginine kinase                                | Arginine_kinase_like            | isotig05009 | 193  | NO  |
| 267 | Arginine kinase                                | Arginine_kinase_like            | isotig07053 | 85   | SP  |
| 103 | Aspartate aminotransferase                     | AAT_like                        | isotig05828 | 251  | NO  |
| 192 | Aspartate aminotransferase                     | AAT_like                        | isotig07486 | 130  | NO  |
| 378 | Aspartyl aminopeptidase                        | M20_dimer                       | isotig11977 | 50   | NO  |
| 188 | Aspartyl protease (necepsin)                   | pepsin_retropepsin_like         | isotig06497 | 136  | SP  |
| 80  | Aspartyl protease inhibitor                    | API3                            | isotig05063 | 355  | SP  |
| 305 | Aspartyl-tRNA synthetase                       | PTZ00401 multidomain            | isotig05959 | 70   | NO  |
| 313 | Astacin protease family member                 | ZnMc_astacin_like               | isotig01791 | 67   | SP* |
| 389 | Astacin protease family member                 | ZnMc_astacin_like               | isotig01799 | 47   | SP* |
| 258 | Astacin protease family member (fragment)      | None                            | isotig01219 | 89   | SP  |
| 122 | ATP synthase alpha chain                       | F1_ATPase_alpha                 | isotig05818 | 215  | NO  |
| 148 | ATP synthase beta chain                        | F1-ATPase_beta                  | isotig04816 | 176  | NO  |
| 298 | ATP-citrate synthase                           | PLN02235; PLN02522 multidomains | isotig05344 | 75   | NO  |
| 349 | ATP-dependent RNA helicase                     | PTZ00424 multidomain            | isotig05452 | 57   | NO  |
| 24  | Beta-tubulin                                   | Beta-tubulin                    | isotig06421 | 1179 | NO  |
| 60  | C-type lectin                                  | CLECT                           | isotig02337 | 499  | SP  |
| 330 | C-type lectin mannose receptor-like            | CLECT (Double)                  | isotig00496 | 61   | SP  |
| 346 | Calmodulin                                     | EFh (Double)                    | isotig07710 | 57   | NO  |
| 107 | Calponin domain-containing protein             | CH                              | isotig06059 | 247  | NO  |
| 45  | Calreticulin                                   | Calreticulin                    | Hpb-CRT     | 636  | SP  |
| 113 | Calumenin                                      | PTZ—184 multidomain             | isotig07880 | 240  | NO  |
| 444 | CAND1 protein                                  | None                            | isotig11079 | 36   | NO  |
| 338 | Cathepsin Z                                    | Peptidase_C1A_CathepsinX        | isotig08307 | 59   | SP  |
| 189 | Cathepsin-B like cysteine protease             | Peptidase_C1                    | isotig07017 | 136  | SP  |
| 222 | Chaperonin containing TCP-1 family member      | TCP1_gamma                      | isotig05912 | 106  | NO  |
| 237 | Chaperonin containing TCP-1 family member      | TCP1_theta                      | isotig01160 | 95   | NO  |

|     |                                           |                           |             |     |     |
|-----|-------------------------------------------|---------------------------|-------------|-----|-----|
| 276 | Chaperonin containing TCP-1 family member | TCP1_zeta                 | isotig04788 | 82  | NO  |
| 341 | Chaperonin containing TCP-1 family member | TCP1_epsilon              | isotig04754 | 58  | NO  |
| 356 | Chaperonin containing TCP-1 family member | TCP1_beta                 | isotig06009 | 55  | NO  |
| 413 | Chaperonin containing TCP-1 family member | TCP1_delta                | isotig05820 | 42  | NO  |
| 431 | Chaperonin containing TCP-1 family member | chaperonin_like / TCP-1   | isotig07985 | 39  | NO  |
| 166 | Chaperonin-10kDa / HSP10                  | cpn10                     | isotig13062 | 157 | NO  |
| 251 | Chaperonin-like domain containing protein | Chaperonin_like           | isotig03049 | 91  | NO  |
| 352 | Chloride intracellular channel exc-4      | GST_N_CLIC; GST_C_CLIC    | isotig06967 | 56  | NO  |
| 51  | Chondroitin family member                 | None                      | isotig01493 | 571 | SP  |
| 65  | Chondroitin family member                 | CBM_14 (Triple)           | isotig06559 | 433 | SP* |
| 247 | Chondroitin family member                 | None                      | isotig08745 | 92  | SP  |
| 297 | Chondroitin family member                 | None                      | isotig04525 | 75  | SP  |
| 160 | Citrate synthase                          | cit_synth_euk multidomain | isotig06035 | 163 | NO  |
| 381 | Coatomer alpha subunit                    | COPI_C                    | isotig11474 | 49  | NO  |
| 255 | Coatomer beta subunit                     | Coatomer_beta_C           | isotig05739 | 90  | NO  |
| 265 | Coatomer beta subunit (fragment)          | Adaptin_N                 | sing06044   | 88  | NO  |
| 369 | Coatomer gamma subunit                    | Gamma-COP                 | isotig06416 | 53  | NO  |
| 279 | Cold shock DNA binding protein            | CSP_CDS                   | isotig06639 | 81  | NO  |
| 453 | Cold shock DNA binding protein            | CSP_CDS                   | isotig07660 | 34  | NO  |
| 64  | CSN-2 Conserved secreted protein, No SP   | None                      | isotig04423 | 449 | NO  |
| 71  | CSN-5 Conserved secreted protein, No SP   | None                      | isotig03664 | 393 | NO  |
| 434 | CSP-2 Conserved secreted protein with SP  | None                      | isotig09016 | 37  | SP  |
| 436 | CSP-4 Conserved secreted protein with SP  | None                      | isotig13290 | 37  | SP  |
| 95  | CXN-1 Conserved eXtract protein , No SP   | None                      | isotig04424 | 288 | NO  |
| 170 | CXN-2 Conserved eXtract protein , No SP   | None                      | isotig07739 | 150 | NO  |
| 358 | CXN-3 Conserved eXtract protein , No SP   | None                      | isotig12324 | 55  | NO  |
| 443 | CXN-4 Conserved eXtract protein , No SP   | None                      | isotig09523 | 36  | NO  |
| 462 | CXN-5 Conserved eXtract protein , No SP   | None                      | isotig10187 | 33  | NO  |
| 149 | CXP-1 Conserved eXtract protein with SP   | None                      | isotig09502 | 175 | SP* |
| 372 | CXP-2 Conserved eXtract protein with SP   | None                      | isotig15534 | 52  | SP* |
| 404 | CXP-3 Conserved eXtract protein with SP   | None                      | isotig11370 | 44  | SP* |
| 419 | CXP-4 Conserved eXtract protein with SP   | None                      | isotig05214 | 41  | SP  |
| 466 | CXP-5 Conserved eXtract protein with SP   | None                      | isotig18098 | 33  | SP  |
| 471 | CXP-6 Conserved eXtract protein with SP   | None                      | isotig09442 | 33  | SP  |
| 75  | Cyclophilin                               | Cyclophilin               | isotig11124 | 364 | NO  |

|     |                                                               |                                  |             |      |     |
|-----|---------------------------------------------------------------|----------------------------------|-------------|------|-----|
| 303 | Cyclophilin                                                   | Cyclophilin                      | isotig09088 | 71   | SP  |
| 43  | Cystathionine beta-synthase                                   | CBS_like (Double)                | isotig05473 | 681  | NO  |
| 316 | Cystathionine gamma lyase                                     | CGS_like                         | isotig08128 | 66   | NO  |
| 304 | Cystatin                                                      | CY                               | isotig02700 | 71   | SP  |
| 385 | Cysteinyl-tRNA-synthetase                                     | PTZ00399 multidomain             | isotig05483 | 48   | NO  |
| 77  | Cytochrome C                                                  | Cytochrome C                     | isotig11144 | 361  | NO  |
| 76  | Dehydrogenase                                                 | NADB_Rossmann                    | isotig03780 | 363  | NO  |
| 102 | Dehydrogenase                                                 | NADB_Rossmann                    | isotig03781 | 251  | NO  |
| 184 | Dehydrogenase                                                 | NADB_Rossmann                    | isotig02879 | 139  | NO  |
| 288 | Dehydrogenase                                                 | NADB_Rossmann                    | isotig08068 | 78   | NO  |
| 332 | Dehydrogenase                                                 | NADB_Rossmann; SCP2              | isotig06089 | 60   | NO  |
| 396 | Deoxyribose-phosphate aldolase                                | DeoC                             | isotig08339 | 45   | NO  |
| 294 | Dimethylglycine dehydrogenase                                 | GcvT multidomain                 | isotig03567 | 76   | NO  |
| 159 | Disorganised muscle protein 1                                 | Ig (Triple)                      | isotig07447 | 164  | NO  |
| 407 | Disorganised muscle protein 1                                 | Ig                               | isotig09618 | 43   | NO  |
| 257 | DJ-1 family protein (fragment)                                | None                             | isotig19944 | 89   | NO  |
| 440 | DnaJ protein                                                  | DnaJ AND DnAJ_C                  | isotig06729 | 36   | NO  |
| 134 | DUF148 domain containing protein                              | DUF148                           | isotig13830 | 194  | SP  |
| 401 | DUF866 domain-containing protein                              | DUF866                           | isotig10169 | 44   | SP  |
| 458 | Electron transfer flavoprotein beta-subunit                   | ETF_beta                         | isotig08800 | 34   | NO  |
| 16  | Enolase                                                       | Enolase                          | isotig06965 | 1476 | NO  |
| 68  | Enolase (fragment)                                            | TIM_phosphate_binding            | isotig18996 | 404  | NO  |
| 231 | ERM family member                                             | B41 multidomain; ERM multidomain | isotig02815 | 100  | NO  |
| 240 | Eukaryotic translation elongation factor 1                    | Gst multidomain                  | isotig06752 | 95   | NO  |
| 244 | Eukaryotic translation elongation factor 1 beta               | EF1B                             | isotig08621 | 94   | NO  |
| 284 | Eukaryotic translation elongation factor 1 beta / delta chain | EF1B                             | isotig08430 | 79   | NO  |
| 20  | Eukaryotic translation elongation factor 1A                   | EF-1_alpha multidomain           | isotig06220 | 1223 | NO  |
| 23  | Eukaryotic translation elongation factor 1A                   | EF-1_alpha multidomain           | isotig02523 | 1187 | NO  |
| 28  | Eukaryotic translation elongation factor 2                    | PTZ00416 multidomain             | isotig05363 | 1015 | NO  |
| 402 | Eukaryotic translation initiation factor 2 subunit 3          | PTZ00327 multidomain             | isotig01314 | 44   | NO  |
| 319 | Eukaryotic translation initiation factor 3                    | eIF3_subunit                     | isotig08356 | 63   | NO  |
| 66  | Eukaryotic translation initiation factor 4A                   | PTZ00424 multidomain             | isotig06491 | 432  | NO  |
| 167 | Eukaryotic translation initiation factor 5A                   | PTZ00328 multidomain             | isotig07287 | 157  | NO  |
| 58  | Fatty acid and retinol binding protein                        | Gp-FAR-1                         | isotig11475 | 515  | SP* |
| 367 | Fatty acid and retinol binding protein                        | Gp-FAR-1                         | isotig17927 | 53   | SP  |

|     |                                                     |                                |              |     |     |
|-----|-----------------------------------------------------|--------------------------------|--------------|-----|-----|
| 290 | Fatty acid and retinol binding protein (fragment)   | Gp-FAR-1                       | sing12372    | 78  | SP* |
| 342 | Fatty acid oxidation complex alpha, mitochondrial   | fa_ox_alph_mit multidomain     | isotig05577  | 58  | NO  |
| 183 | Ferritin                                            | Ferritin_like                  | isotig15727  | 140 | NO  |
| 430 | Filarial major allergen homolog                     | None                           | isotig14459  | 39  | SP  |
| 142 | FKBP-type peptidyl propyl cis-trans isomerase       | FKBP_C (Double)                | isotig06189  | 188 | SP  |
| 391 | FKBP-type peptidyl propyl cis-trans isomerase       | FKBP_C                         | isotig02162  | 47  | SP  |
| 96  | Fructose-1,6-bisphosphatase                         | FBPase                         | isotig07764  | 284 | NO  |
| 40  | Fumarase                                            | Fumarase_claSPII               | isotig02533  | 717 | NO  |
| 248 | Fumarase (fragment)                                 | Lyase_I_like                   | isotig19559  | 92  | NO  |
| 307 | Galectin                                            | GLECT                          | isotig09713  | 69  | NCS |
| 403 | Galectin                                            | GLECT (Double)                 | isotig09082  | 44  | NCS |
| 175 | GDI diSPociation inhibitor family protein           | GDI                            | isotig06832  | 147 | NO  |
| 447 | GDP-4-keto-6-deoxymannose-3,5-epimerase-4-reductase | PLN02725 multidomain           | isotig02599  | 35  | NO  |
| 115 | Glucosamine-fructose-6-phosphate aminotransferase   | PTZ00394 multidomain           | isotig02202  | 235 | NO  |
| 130 | Glucose-6-phosphate isomerase                       | pgi                            | isotig05614  | 199 | NO  |
| 46  | Glutamate dehydrogenase                             | GdhA multidomain               | isotig06500  | 634 | NO  |
| 331 | Glutamine synthetase                                | Gln-synt_N; Gln-synt_C         | isotig17753  | 60  | NO  |
| 256 | Glutamine synthetase family member                  | Gln-synt_C                     | isotig13122  | 90  | NO  |
| 72  | Glutathione S-transferase                           | PTZ00057 multidomain           | isotig10292  | 389 | NO  |
| 81  | Glutathione S-transferase                           | PTZ00057 multidomain           | EST_HPC00001 | 351 | NO  |
| 89  | Glutathione S-transferase                           | PTZ00057 multidomain           | isotig11588  | 322 | NO  |
| 92  | Glutathione S-transferase                           | PTZ00057 multidomain           | isotig04128  | 302 | NO  |
| 101 | Glutathione S-transferase                           | PTZ00057 multidomain           | isotig10201  | 254 | NO  |
| 308 | Glutathione S-transferase                           | GST_C                          | isotig12717  | 68  | NO  |
| 350 | Glutathione S-transferase                           | PTZ00057 multidomain           | isotig04252  | 56  | NO  |
| 44  | Glyceraldehyde 3-phosphate dehydrogenase            | PTZ00023 multidomain           | isotig03503  | 646 | NO  |
| 153 | Glycogen phosphorylase                              | Glycosyltransferase_GTB_type   | isotig04774  | 168 | NO  |
| 254 | GTP-binding nuclear protein Ran                     | Ras_like_GTPase                | isotig10157  | 90  | NO  |
| 269 | GTP-binding protein                                 | PTZ00258 multidomain           | isotig04927  | 85  | NO  |
| 366 | Heterogeneous nuclear ribonucleoprotein R           | None                           | sing12856    | 53  | NO  |
| 347 | Hexokinase                                          | Hexokinase_2                   | isotig05995  | 57  | NO  |
| 364 | Histidyl tRNA synthetase family member              | HiSP multidomain               | isotig05678  | 53  | NO  |
| 442 | hnRNP-R Q splicing factor family protein            | hnRNP-R-Q multidomain          | isotig10918  | 36  | NO  |
| 325 | Homogentisate 1,2-dioxygenase                       | HgmA                           | isotig06466  | 62  | NO  |
| 252 | HSP20                                               | alpha-crystallin-Hsps_p23-like | isotig16722  | 91  | NO  |

|     |                                       |                         |             |      |     |
|-----|---------------------------------------|-------------------------|-------------|------|-----|
| 375 | HSP20                                 | metazoan_ACD            | isotig01037 | 51   | NO  |
| 437 | HSP20                                 | metazoan_ACD            | isotig14718 | 37   | NO  |
| 30  | HSP60                                 | GroEL                   | isotig06093 | 958  | NO  |
| 25  | HSP70                                 | PTZ00009 multidomain    | isotig07134 | 1167 | NO  |
| 48  | HSP70                                 | PTZ00009 multidomain    | isotig05458 | 585  | NO  |
| 94  | HSP70                                 | PTZ00009 multidomain    | isotig08182 | 296  | NO  |
| 371 | HSP70 family protein                  | PTZ00009 multidomain    | isotig04766 | 52   | NO  |
| 186 | HSP70 (fragment)                      | PTZ00009 multidomain    | isotig16062 | 137  | SP* |
| 370 | HSP70 (fragment)                      | None                    | sing03746   | 53   | NO  |
| 85  | HSP70 (fragment)                      | PTZ00009 multidomain    | isotig13132 | 345  | NO  |
| 228 | HSP70-interacting protein (fragment)  | None                    | sing08010   | 102  | NO  |
| 118 | HSP70C (fragment)                     | PTZ00009 multidomain    | sing16053   | 232  | SP* |
| 10  | HSP90                                 | PTZ00130 multidomain    | isotig04714 | 1831 | NO  |
| 34  | HSP90                                 | PTZ00130 multidomain    | isotig05404 | 851  | SP* |
| 454 | HSP90 co-chaperone CDC37              | CDC37_C                 | isotig10342 | 34   | NO  |
| 99  | Isocitrate lyase-malate synthase      | ICL_PEPM; malate_synt_A | isotig05351 | 282  | NO  |
| 190 | Independent phosphoglycerate mutase   | Sulfatase               | isotig01699 | 136  | NO  |
| 127 | Inorganic pyrophosphatase             | pyrophosphatase         | isotig07567 | 202  | NO  |
| 179 | Isocitrate dehydrogenase              | Iso_dh                  | isotig07188 | 143  | NO  |
| 374 | Isocitrate dehydrogenase              | Iso_dh                  | isotig06937 | 51   | NO  |
| 361 | KH domain-containing protein          | KH-I                    | isotig06958 | 54   | NO  |
| 376 | KH domain-containing protein          | KH (6 x)                | isotig05665 | 50   | NO  |
| 400 | KH domain-containing protein          | PCBP_like_KH; KH-I      | isotig01475 | 45   | NO  |
| 418 | KH domain-containing protein          | KH-I (Double)           | isotig13339 | 41   | NO  |
| 111 | Kunitz inhibitor                      | KU                      | isotig18174 | 240  | SP  |
| 139 | Kunitz inhibitor                      | KU                      | isotig00585 | 190  | SP  |
| 200 | Kunitz inhibitor                      | KU                      | isotig00588 | 122  | SP  |
| 264 | Kunitz inhibitor                      | KU                      | isotig01217 | 88   | SP  |
| 272 | Kunitz inhibitor                      | KU                      | isotig16191 | 83   | SP  |
| 273 | Kunitz inhibitor                      | KU                      | isotig02721 | 82   | SP  |
| 441 | Kunitz inhibitor                      | KU                      | isotig02378 | 36   | SP  |
| 121 | Lactamase_B domain containing protein | Lactamase_B             | isotig06155 | 226  | NO  |
| 225 | Lactate dehydrogenase family membe    | LDH_1                   | isotig07324 | 103  | NO  |
| 163 | Lipid binding protein                 | None                    | isotig10607 | 158  | SP  |
| 327 | Lipid binding protein                 | None                    | isotig11150 | 61   | NO  |

|     |                                                |                  |             |      |     |
|-----|------------------------------------------------|------------------|-------------|------|-----|
| 120 | Lipocalin domain-containing protein            | Lipocalin        | isotig05316 | 229  | SP  |
| 249 | Lipocalin domain-containing protein            | Lipocalin        | isotig12919 | 92   | NO  |
| 492 | M20_dimer domain containing protein            | M20_dimer        | isotig06288 | 29   | NO  |
| 326 | M20_dimer domain containing protein (fragment) | M20_dimer        | sing10214   | 61   | NO  |
| 158 | M20_dimer domain-containing protein            | ArgE multidomain | isotig06447 | 164  | NO  |
| 318 | M20_dimer domain-containing protein            | M20_dimer        | isotig11202 | 63   | NO  |
| 176 | Macrophage migration inhibitory factor         | MIF              | isotig14084 | 145  | NO  |
| 73  | Macrophage migration inhibitory factor         | MIF              | isotig14093 | 383  | NO  |
| 11  | Major sperm protein                            | Motile_Sperm     | isotig01565 | 1820 | NO  |
| 52  | Malate dehydrogenase                           | LDH_MDH_like     | isotig05076 | 561  | SP  |
| 165 | Malate dehydrogenase                           | LDH_MDH_like     | isotig13542 | 158  | NO  |
| 169 | Malate dehydrogenase (fragment)                | LDH_MDH_like     | isotig19584 | 151  | NO  |
| 173 | MFH-1 Ascaris MFP2b homologue                  | MFP2b            | isotig07980 | 148  | NO  |
| 187 | MFH-2 Ascaris MFP2b homologue                  | MFP2b            | isotig07283 | 137  | NO  |
| 337 | Mitochondrial glycoprotein                     | MAM33            | isotig08637 | 59   | NO  |
| 262 | ML-domain containing protein                   | ML               | isotig10098 | 88   | SP  |
| 162 | Motile sperm domain containing protein         | Motile sperm     | isotig16375 | 160  | NO  |
| 213 | Motile sperm domain containing protein         | Motile sperm     | isotig16097 | 114  | NO  |
| 216 | Motile sperm domain containing protein         | Motile sperm     | isotig17038 | 112  | NO  |
| 250 | Motile sperm domain containing protein         | Motile_Sperm     | isotig16212 | 92   | NO  |
| 259 | Motile sperm domain containing protein         | Motile_Sperm     | isotig13560 | 89   | SP  |
| 268 | Motile sperm domain containing protein         | Motile_Sperm     | isotig16934 | 85   | NO  |
| 2   | Myoglobin                                      | globin           | isotig11742 | 3366 | SP  |
| 3   | Myoglobin                                      | globin           | isotig13336 | 3098 | SP* |
| 6   | Myoglobin                                      | globin           | isotig04274 | 2208 | SP  |
| 7   | Myoglobin                                      | globin           | isotig11356 | 2113 | SP* |
| 8   | Myoglobin                                      | globin           | isotig05169 | 1977 | SP  |
| 9   | Myoglobin                                      | globin           | isotig04273 | 1833 | SP  |
| 14  | Myoglobin                                      | globin           | isotig11666 | 1607 | SP  |
| 41  | Myoglobin                                      | globin           | isotig12632 | 698  | SP* |
| 54  | Myoglobin                                      | globin           | isotig13442 | 531  | SP* |
| 57  | Myoglobin (fragment)                           | None             | isotig19571 | 521  | SP* |
| 229 | Myoglobin (fragment)                           | globin           | isotig19359 | 101  | SP* |
| 328 | Myosin heavy chain                             | Motor            | isotig12780 | 61   | NO  |
| 97  | NAC domain-containing protein                  | NAC              | isotig10507 | 283  | NO  |

|     |                                                    |                               |             |      |     |
|-----|----------------------------------------------------|-------------------------------|-------------|------|-----|
| 172 | NAC domain-containing protein                      | NAC                           | isotig09958 | 149  | NO  |
| 380 | NAD-dependent malic enzyme mitochondrial precursor | PTZ00317 multidomain          | isotig05529 | 50   | NO  |
| 450 | NAD-dependent malic enzyme mitochondrial precursor | NADB_Rossmann; malic          | isotig07056 | 35   | NO  |
| 185 | NADH-dependent fumarate reductase                  | flavo_cyto_c                  | isotig02473 | 138  | SP  |
| 15  | Nematode polyprotein allergen NPA-1                | None                          | isotig02438 | 1562 | SP  |
| 116 | Nitrilase                                          | Nitrilase                     | isotig09180 | 232  | NO  |
| 345 | Nitrilase                                          | Nitrilase_CH                  | isotig10241 | 58   | NO  |
| 357 | NTF2 domain containing protein                     | NTF2_like                     | isotig13143 | 55   | NO  |
| 517 | NTF2 domain-containing protein                     | NTF2_like                     | isotig11764 | 27   | NO  |
| 69  | Nucleoside diphosphate kinase                      | NDPk_I                        | isotig05236 | 401  | SP  |
| 50  | Nucleosome assembly protein                        | NAP multidomain               | isotig04959 | 573  | NO  |
| 433 | NUDC protein                                       | p23_mNUDC_like                | isotig06887 | 38   | NO  |
| 424 | NSN-1 Novel Secreted protein, No SP                | None                          | isotig18405 | 40   | NO  |
| 156 | NSP-30 Novel secreted protein with SP              | None                          | isotig12701 | 166  | SP  |
| 143 | NSP-39 Novel secreted protein with SP              | None                          | isotig16333 | 187  | SP  |
| 446 | NSP-59 Novel secreted protein with SP              | None                          | isotig13319 | 35   | SP  |
| 195 | NXN-1 Novel eXtract protein, No SP                 | None                          | isotig00483 | 128  | NO  |
| 438 | NXN-2 Novel eXtract protein, No SP                 | None                          | isotig05106 | 37   | NO  |
| 280 | NXN-3 Novel eXtract protein, No SP                 | None                          | isotig16236 | 80   | SP  |
| 282 | NXN-4 Novel eXtract protein, No SP                 | None                          | isotig18432 | 80   | SP  |
| 373 | NXN-5 Novel eXtract protein, No SP                 | None                          | isotig04670 | 51   | SP  |
| 88  | Oxidoreductase                                     | Aldo_ket_red                  | isotig08193 | 323  | NO  |
| 203 | Oxidoreductase                                     | Aldo_ket_red                  | isotig08526 | 119  | NO  |
| 212 | Oxidoreductase                                     | Aldo_ket_red                  | isotig10598 | 114  | NO  |
| 182 | PA2G4 domain containing protein                    | PTZ00053 multidomain          | isotig05953 | 140  | NO  |
| 108 | PAZ / PIWI domain containing protein               | PAZ_argonaute_like; PIWI-like | isotig06344 | 246  | NO  |
| 281 | PB1 domain containing protein                      | PB1                           | isotig11115 | 80   | NO  |
| 61  | Phosphatidylethanolamine-binding protein           | PEBP_euk                      | isotig05126 | 469  | SP  |
| 220 | Phosphatidylethanolamine-binding protein           | PEPB_euk                      | isotig15978 | 108  | NO  |
| 12  | Phosphoenolpyruvate carboxykinase                  | PEPCK_GTP                     | isotig05532 | 1713 | NO  |
| 129 | Phosphoenolpyruvate carboxykinase                  | PEPCK_HprK                    | isotig12895 | 199  | NO  |
| 302 | Phosphofructokinase                                | PFK                           | isotig05374 | 72   | NO  |
| 426 | Phosphoglucomutase 2                               | PGM2                          | isotig06281 | 40   | NO  |
| 53  | Phosphoglycerate_kinase                            | Phosphoglycerate_kinase       | isotig06484 | 533  | SP* |
| 226 | Phytanoyl-CoA dioxygenase domain protein           | PhyH                          | isotig08004 | 103  | NO  |



|     |                                                  |                            |             |      |     |
|-----|--------------------------------------------------|----------------------------|-------------|------|-----|
| 155 | Piwi domain-containing protein                   | Piwi-like                  | isotig04875 | 167  | NO  |
| 384 | PKc_like domain-containing protein               | PKc_like                   | isotig07398 | 48   | NO  |
| 392 | PRK14867 domain-containing protein               | PRK14867 multidomain       | isotig17933 | 47   | SP* |
| 329 | Profilin                                         | PROF                       | isotig14715 | 61   | NO  |
| 275 | Prolidase                                        | Prolidase                  | isotig06293 | 82   | NO  |
| 390 | Proliferating cell nuclear antigen               | PCNA                       | isotig05148 | 47   | NO  |
| 340 | Proline hydroxylase family member                | 2OG-Fell_Oxy               | isotig06025 | 59   | SP  |
| 287 | Prolyl tRNA Synthetase family member             | pros_fam_I multidomain     | isotig02410 | 79   | NO  |
| 224 | Propionyl Coenzyme A carboxylase                 | ACCA                       | isotig05662 | 104  | NO  |
| 315 | Propionyl-CoA carboxylase alpha chain            | CPSase_L_D2                | isotig17907 | 66   | NO  |
| 246 | Protein arginine N-methyltransferase             | AdoMet_Mtases              | isotig06594 | 92   | NO  |
| 17  | Protein disulfide isomerase                      | ER_PDI_fam multidomain     | isotig05787 | 1465 | SP  |
| 31  | Protein disulfide isomerase                      | ER_PDI_fam multidomain     | isotig01916 | 902  | SP* |
| 126 | Protein disulfide isomerase                      | Thioredoxin_like (Triple)  | isotig06295 | 204  | SP* |
| 168 | Protein disulfide isomerase                      | PDI_a_P5 AND P5_C (Double) | isotig06159 | 154  | SP  |
| 236 | Protein phosphatase PP2A regulatory subunit      | Peptidase_M3_like          | isotig07555 | 96   | NO  |
| 241 | Proteosome beta subunit family member            | proteosome_beta_type_6     | isotig11170 | 95   | NO  |
| 348 | Proteosome beta subunit family member            | proteosome_beta_type_4     | isotig09724 | 57   | NO  |
| 360 | Proteosome regulatory particle ATPase-like       | AAA                        | isotig04911 | 55   | NO  |
| 457 | Proteosome Rpn13 ubiquitin receptor              | Proteasom_Rpn13            | isotig06315 | 34   | NO  |
| 393 | Proteosome subunit alpha type 3                  | proteosome_alpha_type_3    | isotig08454 | 46   | NO  |
| 291 | Proteosome subunit alpha type 4                  | proteosome_alpha_type_4    | isotig08076 | 78   | NO  |
| 301 | Proteosome subunit alpha type 7-1                | proteosome_alpha_type_7    | isotig08062 | 72   | NO  |
| 421 | Proteosome subunit beta type 5                   | proteosome_beta_type_5     | isotig08215 | 41   | NO  |
| 124 | PurA ssDNA and RNA-binding protein               | PurA multidomain           | isotig07421 | 210  | NO  |
| 321 | Pyruvate dehydrogenase complex E1 subunit beta   | PTZ00812 multidomain       | isotig07089 | 63   | NO  |
| 292 | Pyruvate kinase                                  | Pyruvate_kinase            | isotig05769 | 77   | NO  |
| 333 | Pyruvate kinase                                  | Pyruvate_kinase            | isotig03339 | 60   | NO  |
| 351 | Rab family protein                               | Ras_like_GTPase            | isotig07100 | 56   | NO  |
| 154 | Rab GDP dissociation inhibitor                   | GDI                        | isotig06129 | 168  | NO  |
| 79  | RACK family member                               | WD40                       | isotig07754 | 358  | NO  |
| 205 | Receptor mediated endocytosis protein (fragment) | Ras_like_GTPase            | sing03091   | 119  | NO  |
| 67  | Retinol binding protein                          | Gp-FAR-1                   | Hpb-RBP     | 419  | SP  |
| 311 | Ribonucleotide reductase family member           | RNRR2                      | isotig02547 | 67   | NO  |
| 104 | Ribosomal protein 40S S2 / laminin receptor      | RSP2                       | isotig02864 | 250  | NO  |

|     |                                        |                              |             |     |    |
|-----|----------------------------------------|------------------------------|-------------|-----|----|
| 133 | Ribosomal protein 40S S2               | Ribosomal_S5; Ribosomal_S5_C | isotig08698 | 195 | NO |
| 86  | Ribosomal protein 40S S3               | PTZ00084 multidomain         | isotig09688 | 345 | NO |
| 235 | Ribosomal protein 40S S3a              | Ribosomal_S3Ae               | isotig03920 | 97  | NO |
| 63  | Ribosomal protein 40S S4               | Ribosomal_S4e                | isotig05116 | 463 | NO |
| 112 | Ribosomal protein 40S S5               | Ribosomal_S7                 | isotig05158 | 240 | NO |
| 312 | Ribosomal protein 40S S6               | Ribosomal_S6e                | isotig09051 | 67  | NO |
| 299 | Ribosomal protein 40S S7               | Ribosomal_S7e                | isotig13724 | 74  | NO |
| 36  | Ribosomal protein 40S S8               | Ribosomal_S8e                | isotig10482 | 785 | NO |
| 171 | Ribosomal protein 40S S9               | Ribosomal_S4                 | isotig13051 | 149 | NO |
| 253 | Ribosomal protein 40S S10              | S10_plectin                  | isotig17185 | 91  | NO |
| 344 | Ribosomal protein 40S S11              | Ribosomal_S17                | isotig12166 | 58  | NO |
| 260 | Ribosomal protein 40S S12              | Ribosomal_L7Ae               | isotig05275 | 89  | NO |
| 199 | Ribosomal protein 40S S13              | Ribosomal_S13_N; S15p_S13e   | isotig15873 | 125 | NO |
| 152 | Ribosomal protein 40S S14              | Ribosomal_S11                | isotig14208 | 169 | NO |
| 145 | Ribosomal protein 40S S15              | Ribosomal_S19                | isotig13079 | 183 | NO |
| 161 | Ribosomal protein 40S S15a             | Ribosomal_S8                 | isotig14649 | 162 | NO |
| 317 | Ribosomal protein 40S S16              | Ribosomal_S9                 | isotig16303 | 65  | NO |
| 198 | Ribosomal protein 40S S17              | Ribosomal_S17e               | isotig12142 | 126 | NO |
| 140 | Ribosomal protein 40S S18              | Ribosomal_S13                | isotig12489 | 189 | NO |
| 230 | Ribosomal protein 40S S19S             | Ribosomal_S19e               | isotig15314 | 100 | NO |
| 408 | Ribosomal protein 40S S20              | Ribosomal_S10                | isotig10563 | 43  | NO |
| 234 | Ribosomal protein 40S S21              | Ribosomal_S21e               | isotig18026 | 97  | NO |
| 309 | Ribosomal protein 40S S23              | Ribosomal_S23                | isotig12594 | 68  | NO |
| 277 | Ribosomal protein 40S S24              | Ribosomal_S24e               | isotig13723 | 82  | NO |
| 164 | Ribosomal protein 40S S25              | Ribosomal_S25                | isotig14399 | 158 | NO |
| 106 | Ribosomal protein 40S S27a / Ubiquitin | Ribosomal_S27; UBL           | isotig12183 | 248 | SP |
| 286 | Ribosomal protein 40S S28              | S1_S28E                      | isotig13459 | 79  | NO |
| 144 | Ribosomal protein 60S L3               | Ribosomal_L3                 | isotig07102 | 183 | NO |
| 109 | Ribosomal protein 60S L4               | Ribosomal_L4                 | isotig05058 | 245 | NO |
| 174 | Ribosomal protein 60S L5               | Ribosomal_L18_L5e            | isotig08825 | 148 | NO |
| 55  | Ribosomal protein 60S L6               | Ribosomal_L6e                | isotig11208 | 524 | NO |
| 141 | Ribosomal protein 60S L7               | Ribosomal_L7_archaeal_euk    | isotig05120 | 188 | NO |
| 70  | Ribosomal protein 60S L7a              | Ribosomal_L7Ae               | isotig09109 | 397 | NO |
| 114 | Ribosomal protein 60S L8               | Ribosomal_L2; Ribosomal_L2_C | isotig09853 | 236 | NO |
| 206 | Ribosomal protein 60S L9               | Ribosomal_L6 (Double)        | isotig11630 | 118 | NO |

|     |                                       |                                |                   |     |    |
|-----|---------------------------------------|--------------------------------|-------------------|-----|----|
| 83  | Ribosomal protein 60S L10             | Ribosomal_L16_L10e             | isotig12696       | 346 | NO |
| 147 | Ribosomal protein 60S L10a            | Ribosomal_L1                   | isotig10216       | 177 | NO |
| 197 | Ribosomal protein 60S L11             | Ribosomal_L5; Ribosomal_L5_C   | isotig05190       | 127 | NO |
| 100 | Ribosomal protein 60S L12             | Ribosomal_L11                  | isotig11621       | 278 | NO |
| 211 | Ribosomal protein 60S L13             | Ribosomal_L13e                 | isotig10533       | 115 | NO |
| 336 | Ribosomal protein 60S L13a            | Ribosomal_L13                  | isotig05197       | 59  | NO |
| 78  | Ribosomal protein 60S L14             | Ribosomal_L14e                 | isotig14543       | 359 | NO |
| 271 | Ribosomal protein 60S L15             | Ribosomal_L15e                 | isotig13451       | 83  | NO |
| 117 | Ribosomal protein 60S L17             | Ribosomal_L22                  | isotig12065       | 232 | NO |
| 62  | Ribosomal protein 60S L18             | Ribosomal_L18e                 | isotig10630       | 465 | NO |
| 221 | Ribosomal protein 60S L18a            | Ribosomal_L18ae                | isotig10555       | 107 | NO |
| 135 | Ribosomal protein 60S L19             | Ribosomal_L19e                 | isotig03672       | 193 | NO |
| 207 | Ribosomal protein 60S L21             | Ribosomal_L21e                 | isotig19197       | 117 | NO |
| 180 | Ribosomal protein 60S L22             | Ribosomal_L22e                 | isotig12702       | 142 | NO |
| 132 | Ribosomal protein 60S L23             | Ribosomal_L14                  | isotig13719       | 198 | NO |
| 105 | Ribosomal protein 60S L23a            | Ribosomal_L23; Ribosomal_L23eN | isotig13023       | 249 | NO |
| 379 | Ribosomal protein 60S L26             | KOW                            | isotig14151       | 50  | NO |
| 266 | Ribosomal protein 60S L27s            | Ribosomal_L27e                 | isotig05318       | 86  | NO |
| 125 | Ribosomal protein 60S L30             | Ribosomal_L7Ae                 | isotig16239       | 205 | NO |
| 208 | Ribosomal protein 60S L31             | Ribosomal_L31e                 | isotig05290       | 116 | NO |
| 296 | Ribosomal protein 60S L32             | Ribosomal_L32_L32e             | isotig05285       | 76  | NO |
| 429 | Ribosomal protein 60S L34             | Ribosomal_L34e                 | isotig16517       | 39  | NO |
| 181 | Ribosomal protein 60S L35             | Ribosomal_L29_HIP; ALDH-SF     | isotig12010       | 141 | NO |
| 191 | Ribosomal protein 60S L36             | Ribosomal_L36e                 | isotig16834       | 131 | NO |
| 209 | Ribosomal protein 60S L40 / Ubiquitin | Ribosomal_L40e; Ubiquitin      | isotig13199       | 116 | NO |
| 243 | Ribosomal protein 60S L44             | Ribosomal_L44                  | isotig17801       | 94  | NO |
| 29  | Ribosomal protein 60S P0              | Ribosomal_P0_L10e              | isotig01358       | 965 | NO |
| 151 | Ribosomal protein 60S P1              | Ribosomal_P1                   | EST Hp_ADY_001B04 | 170 | NO |
| 233 | RNA helicase                          | PTZ00424 multidomain           | isotig06568       | 98  | NO |
| 322 | RRM / La domain containing protein    | RRM; La                        | isotig06631       | 63  | NO |
| 217 | RRM domain-containing protein         | RRM                            | isotig16405       | 112 | NO |
| 223 | RRM domain-containing protein         | RRM (Triple)                   | isotig08546       | 105 | NO |
| 353 | RRM domain containing protein         | RRM                            | isotig11375       | 56  | NO |
| 415 | Sec23 protein                         | SEC23 multidomain              | isotig08978       | 42  | NO |
| 435 | Sec23/Sec24 protein                   | PTZ00395 multidomain           | isotig04740       | 37  | NO |

|     |                                              |                                 |              |     |     |
|-----|----------------------------------------------|---------------------------------|--------------|-----|-----|
| 423 | Serine hydroxymethyltransferase              | AAT_I                           | isotig11836  | 40  | NO  |
| 359 | Serine/threonine protein phosphatase PP1     | MPP_PP1_PPKL                    | isotig04854  | 55  | NO  |
| 35  | Serpin                                       | Serpin                          | isotig02225  | 788 | NFL |
| 355 | Seryl tRNA synthetase family member          | SerRS_core                      | isotig02126  | 56  | NO  |
| 343 | Shwachman-Bodian-Diamond syndrome protein    | SBDS; SBDS_C                    | isotig08194  | 58  | NO  |
| 439 | Single strand binding protein                | SSB / RPA_2b-aaRSs_OBF_like     | isotig19033  | 37  | NO  |
| 238 | Staphylococcal nuclease family member        | SNC                             | isotig19144  | 95  | NO  |
| 285 | Staphylococcal nuclease family member        | SNC                             | isotig05969  | 79  | NO  |
| 394 | Succinate dehydrogenase flavoprotein subunit | PTZ00139 multidomain            | isotig02837  | 46  | NO  |
| 386 | Superoxide dismutase                         | Cu-Zn_Superoxide_Dismutase      | isotig09104  | 48  | NO  |
| 245 | Thioredoxin family protein                   | Thioredoxin_like                | isotig15326  | 93  | NO  |
| 411 | Thioredoxin family protein                   | TRX_family; PITH                | isotig09330  | 43  | NO  |
| 414 | Thioredoxin family protein                   | Thioredoxin_like                | isotig02471  | 42  | SP* |
| 37  | Thioredoxin peroxidase                       | Thioredoxin_like                | isotig05188  | 771 | NO  |
| 150 | Thioredoxin peroxidase                       | Thioredoxin_like                | isotig09347  | 172 | NO  |
| 363 | Thiosulfate sulfurtransferase                | TST_Repeat_1; TST_Repeat_2      | isotig07042  | 53  | NO  |
| 412 | TIGR02231 domain containing protein          | TIGR02231 multidomain           | isotig00944  | 42  | NO  |
| 110 | TIL domain-containing protein                | TIL                             | EST_HPC00030 | 245 | SP  |
| 416 | TIL domain-containing protein                | TIL                             | isotig00779  | 42  | SP* |
| 136 | TPR domain-containing protein                | TPR                             | isotig07234  | 193 | NO  |
| 323 | Transaldolase                                | Transaldolase_Ta1AB             | isotig07176  | 62  | NO  |
| 84  | Transketolase                                | PTZ00182 multidomain            | isotig02953  | 346 | NO  |
| 131 | Triose phosphate isomerase                   | TIM_phosphate_binding           | isotig05016  | 198 | NO  |
| 49  | Tropomyosin                                  | Tropomyosin multidomain; DUF106 | Hpb-TRP      | 585 | NO  |
| 406 | Troponin family protein                      | Troponin                        | isotig09533  | 43  | NO  |
| 306 | TROVE domain protein                         | TROVE                           | sing12575    | 70  | NO  |
| 177 | TTR-1                                        | DUF290                          | isotig04612  | 144 | SP  |
| 261 | TTR-5 Transthyretin related                  | DUF290                          | isotig13207  | 88  | SP  |
| 123 | TTR-6 Transthyretin related                  | DUF290                          | isotig05212  | 210 | SP  |
| 270 | TTR-10 Transthyretin related                 | DUF290                          | isotig11792  | 84  | SP  |
| 242 | TTR-11 Transthyretin related                 | DUF290                          | isotig04258  | 95  | SP  |
| 91  | TTR-13 Transthyretin related                 | DUF290                          | isotig13284  | 304 | SP  |
| 210 | TTR-14 Transthyretin related                 | DUF290                          | isotig14796  | 115 | SP* |
| 289 | TTR-15 Transthyretin related                 | DUF290                          | isotig15268  | 78  | SP* |
| 314 | TTR-16 Transthyretin related                 | DUF290                          | isotig14690  | 66  | SP  |

|     |                                             |                         |               |      |     |
|-----|---------------------------------------------|-------------------------|---------------|------|-----|
| 335 | TTR-17 Transthyretin related                | DUF290                  | isotig15111   | 60   | SP  |
| 420 | Tyrosyl-tRNA-synthetase                     | nt_trans                | isotig06363   | 41   | NO  |
| 202 | Ubiquitin C-terminal hydrolase              | Peptidase_C12           | isotig13387   | 120  | NO  |
| 399 | Ubiquitin C-terminal hydrolase              | Peptidase_C12           | isotig01648   | 45   | NO  |
| 425 | UDP-galactose 4-epimerase family member     | NADB_Rossmann           | isotig04925   | 40   | NO  |
| 218 | UDP-glucose pyrophosphorylase               | UGPase_euk              | isotig02441   | 111  | NO  |
| 295 | Unidentified vitellogenin-linked transcript | None                    | isotig10045   | 76   | NO  |
| 93  | Ureidopropionase                            | Nitrilase               | isotig08079   | 300  | NO  |
| 263 | Vacuolar H ATPase protein 8                 | ATP-synt_B              | isotig08386   | 88   | NO  |
| 293 | VAL-1.1                                     | SCP (Double)            | isotig06320   | 77   | SP  |
| 388 | VAL-1.3                                     | SCP (Double)            | isotig06456   | 47   | SS  |
| 227 | VAL-2.1/2.2/2.3                             | SCP (Double)            | isotig03106   | 103  | SP  |
| 82  | VAL-3.1                                     | SCP (Double)            | isotig05790   | 349  | SP  |
| 365 | VAL-4                                       | SCP (Single)            | isotig10387   | 53   | SP  |
| 194 | VAL-7.1                                     | SCP (Single)            | isotig01524   | 129  | SP  |
| 232 | VAL-7.5                                     | SCP (Single)            | isotig01526   | 100  | SP  |
| 193 | VAL-12                                      | SCP (Double)            | isotig06637   | 130  | SP  |
| 128 | VAL-15                                      | SCP (Double)            | isotig02149   | 200  | SP  |
| 382 | VAL-26                                      | SCP (Single)            | isotig09445   | 49   | SP  |
| 377 | Valyl-tRNA synthetase                       | valS multidomain        | isotig05028   | 50   | NO  |
| 417 | VHS domain-containing protein               | VHS_ENTH_ANTH; GAT      | isotig06483   | 41   | NO  |
| 1   | Vitellogenin                                | DUF1943; Vitellogenin_N | contig00471   | 3369 | SP  |
| 18  | Vitellogenin                                | DUF1943                 | contig00207   | 1301 | SP* |
| 19  | Vitellogenin                                | VWD                     | contig00212   | 1295 | SP* |
| 26  | Vitellogenin                                | LPD_N                   | contig00203   | 1040 | SP* |
| 27  | Vitellogenin                                | VWD                     | Hp_ADY_001C04 | 1025 | SP* |
| 32  | Vitellogenin                                | Vitellogenin_N          | contig00199   | 884  | SP* |
| 56  | Vitellogenin                                | VWD                     | Hp_ADY_001G11 | 523  | SP* |
| 74  | Vitellogenin                                | None                    | contig00211   | 372  | SP* |
| 146 | Vitellogenin (fragment)                     | Vitellogenin_N          | sing00711     | 179  | SP* |
