# Supplementary material
Source: PubMed Central journal article supplement (PMC4794625)
Supplement: NIHMS67505-supplement-Supplementary_Table_5.pdf [file NIHMS67505-supplement-Supplementary_Table_5.pdf]

### Supplementary Table 3: GO analysis

| HES CELLULAR LOCATION SUMMARY |                                   | count | % total |
|-------------------------------|-----------------------------------|-------|---------|
| none detected                 |                                   | 300   | 80.2    |
| GO:0005576                    | extracellular region              | 44    | 11.8    |
| GO:0005615                    | extracellular space               | 12    | 3.2     |
| GO:0005737                    | cytoplasm                         | 5     | 1.3     |
| GO:0000786                    | nucleosome                        | 3     | 0.8     |
| GO:0005634                    | nucleus                           | 3     | 0.8     |
| GO:0005783                    | endoplasmic reticulum             | 3     | 0.8     |
| GO:0000015                    | phosphopyruvate hydratase complex | 2     | 0.5     |
| GO:0005622                    | intracellular                     | 2     | 0.5     |
| GO:0016020                    | membrane                          | 2     | 0.5     |

  

| HES MOLECULAR FUNCTION SUMMARY |                                              | count | % total |
|--------------------------------|----------------------------------------------|-------|---------|
| none detected                  |                                              | 205   | 54.8    |
| GO:0004222                     | metalloendopeptidase activity                | 21    | 5.6     |
| GO:0003824                     | catalytic activity                           | 19    | 5.1     |
| GO:0004190                     | aspartic-type endopeptidase activity         | 12    | 3.2     |
| GO:0004867                     | serine-type endopeptidase inhibitor activity | 10    | 2.7     |
| GO:0005509                     | calcium ion binding                          | 10    | 2.7     |
| GO:0005515                     | protein binding                              | 10    | 2.7     |
| GO:0043169                     | cation binding                               | 10    | 2.7     |
| GO:0005319                     | lipid transporter activity                   | 9     | 2.4     |
| GO:0005506                     | iron ion binding                             | 9     | 2.4     |
| GO:0020037                     | heme binding                                 | 9     | 2.4     |
| GO:0005488                     | binding                                      | 8     | 2.1     |
| GO:0005524                     | ATP binding                                  | 7     | 1.9     |
| GO:0005544                     | calcium-dependent phospholipid binding       | 7     | 1.9     |
| GO:0008236                     | serine-type peptidase activity               | 7     | 1.9     |
| GO:0019825                     | oxygen binding                               | 7     | 1.9     |
| GO:0005529                     | sugar binding                                | 5     | 1.3     |
| GO:0004197                     | cysteine-type endopeptidase activity         | 4     | 1.1     |
| GO:0005198                     | structural molecule activity                 | 4     | 1.1     |
| GO:0008289                     | lipid binding                                | 4     | 1.1     |

  

| HES BIOLOGICAL PROCESS SUMMARY |                                  | count | % total |
|--------------------------------|----------------------------------|-------|---------|
| none detected                  |                                  | 257   | 68.7    |
| GO:0006508                     | proteolysis                      | 48    | 12.8    |
| GO:0005975                     | carbohydrate metabolic process   | 14    | 3.7     |
| GO:0006869                     | lipid transport                  | 9     | 2.4     |
| GO:0008152                     | metabolic process                | 8     | 2.1     |
| GO:0015671                     | oxygen transport                 | 7     | 1.9     |
| GO:0006096                     | glycolysis                       | 6     | 1.6     |
| GO:0055114                     | oxidation-reduction process      | 6     | 1.6     |
| GO:0006457                     | protein folding                  | 4     | 1.1     |
| GO:0045454                     | cell redox homeostasis           | 4     | 1.1     |
| GO:0006334                     | nucleosome assembly              | 3     | 0.8     |
| GO:0006030                     | chitin metabolic process         | 2     | 0.5     |
| GO:0006629                     | lipid metabolic process          | 2     | 0.5     |
| GO:0006662                     | glycerol ether metabolic process | 2     | 0.5     |
| GO:0006801                     | superoxide metabolic process     | 2     | 0.5     |
| GO:0007155                     | cell adhesion                    | 2     | 0.5     |
| GO:0006004                     | fucose metabolic process         | 1     | 0.3     |

| HEX CELLULAR LOCATION SUMMARY      |     | coun | %     |
|------------------------------------|-----|------|-------|
|                                    | t   |      | total |
| none detected                      | 290 |      | 65.0  |
| GO:0005622 intracellular           | 70  |      | 15.7  |
| GO:0005840 ribosome                | 60  |      | 13.5  |
| GO:0005737 cytoplasm               | 27  |      | 6.1   |
| GO:0005576 extracellular region    | 11  |      | 2.5   |
| GO:0005615 extracellular space     | 10  |      | 2.2   |
| GO:0005839 proteasome core complex | 6   |      | 1.3   |
| GO:0005783 endoplasmic reticulum   | 5   |      | 1.1   |
| GO:0005874 microtubule             | 4   |      | 0.9   |
| GO:0005634 nucleus                 | 3   |      | 0.7   |

| HEX MOLECULAR FUNCTION SUMMARY                |     | coun | %     |
|-----------------------------------------------|-----|------|-------|
|                                               | t   |      | total |
| none detected                                 | 105 |      | 23.5  |
| GO:0003735 structural constituent of ribosome | 61  |      | 13.7  |
| GO:0005524 ATP binding                        | 46  |      | 10.3  |
| GO:0003824 catalytic activity                 | 44  |      | 9.9   |
| GO:0005488 binding                            | 32  |      | 7.2   |
| GO:0016491 oxidoreductase activity            | 29  |      | 6.5   |
| GO:0005515 protein binding                    | 22  |      | 4.9   |
| GO:0000166 nucleotide binding                 | 18  |      | 4.0   |
| GO:0003676 nucleic acid binding               | 16  |      | 3.6   |
| GO:0003723 RNA binding                        | 16  |      | 3.6   |
| GO:0005525 GTP binding                        | 15  |      | 3.4   |
| GO:0005198 structural molecule activity       | 14  |      | 3.1   |
| GO:0020037 heme binding                       | 13  |      | 2.9   |
| GO:0005506 iron ion binding                   | 13  |      | 2.9   |
| GO:0051082 unfolded protein binding           | 12  |      | 2.7   |
| GO:0003924 GTPase activity                    | 11  |      | 2.5   |
| GO:0019825 oxygen binding                     | 11  |      | 2.5   |
| GO:0005319 lipid transporter activity         | 9   |      | 2.0   |
| GO:0008289 lipid binding                      | 8   |      | 1.8   |
| GO:0009055 electron carrier activity          | 8   |      | 1.8   |

| HEX BIOLOGICAL PROCESS SUMMARY                                        |     | coun | %     |
|-----------------------------------------------------------------------|-----|------|-------|
|                                                                       | t   |      | total |
| none detected                                                         | 184 |      | 41.3  |
| GO:0006412 translation                                                | 68  |      | 15.2  |
| GO:0008152 metabolic process                                          | 44  |      | 9.9   |
| GO:0055114 oxidation-reduction process                                | 35  |      | 7.8   |
| GO:0006457 protein folding                                            | 16  |      | 3.6   |
| GO:0006508 proteolysis                                                | 13  |      | 2.9   |
| GO:0005975 carbohydrate metabolic process                             | 12  |      | 2.7   |
| GO:0015671 oxygen transport                                           | 11  |      | 2.5   |
| GO:0006096 glycolysis                                                 | 10  |      | 2.2   |
| GO:0006886 intracellular protein transport                            | 10  |      | 2.2   |
| GO:0006869 lipid transport                                            | 9   |      | 2.0   |
| GO:0044267 cellular protein metabolic process                         | 9   |      | 2.0   |
| GO:0006414 translational elongation                                   | 7   |      | 1.6   |
| GO:0045454 cell redox homeostasis                                     | 7   |      | 1.6   |
| GO:0006418 tRNA aminoacylation for protein translation                | 6   |      | 1.3   |
| GO:0044262 cellular carbohydrate metabolic process                    | 6   |      | 1.3   |
| GO:0051603 proteolysis involved in cellular protein catabolic process | 6   |      | 1.3   |
